# Supplementary material for: Engineering doping-vacancy double defects and insights into the conversion mechanisms of an Mn–O–F ultrafine nanowire anode for enhanced Li/Na-ion storage and hybrid capacitors
Source: Royal Society of Chemistry journal article supplement (doi:10.1039/c9na00521h), 2019-01-01
Supplement: c9na00521h1.pdf [file c9na00521h1.pdf]

## Electronic Supplementary Information

### **Engineering doping-vacancy double defects and insights into the conversion mechanisms of an Mn-O-F ultrafine nanowire anode for enhanced Li/Na-ion storage and hybrid capacitors**

Yongfa Huang, Rui Ding,<sup>\*</sup> Danfeng Ying, Wei Shi, Yuxi Huang, Caini Tan, Xiujuan Sun, Ping Gao, and Enhui Liu

Key Laboratory of Environmentally Friendly Chemistry and Applications of Ministry of Education, College of Chemistry, Xiangtan University, Hunan 411105, P.R. China

\*E-mails: [drm8122@163.com](mailto:drm8122@163.com); [drm8122@xtu.edu.cn](mailto:drm8122@xtu.edu.cn)

## Table of Contents

### Experimental

**Scheme S1** Schematics of the process for the formation of Mn-O-F ultrafine nanowires.

**Figure S1** The crystal structures of tetragonal  $\text{MnF}_2$  (A) and defective  $\text{MnF}_2$ -E (B) and detailed crystalline parameters for tetragonal  $\text{MnF}_2$  (C).

**Figure S2** XRD patterns of  $\text{MnF}_2$  1-9#.

**Figure S3** SEM (A)/TEM (B) images of  $\text{MnF}_2$  8#-E sample.

**Figure S4** A picture of  $\text{MnF}_2$  8# and  $\text{MnF}_2$  8#-E samples.

**Figure S5** EDS spectra of  $\text{MnF}_2$  8# (A) and  $\text{MnF}_2$  8#-E (B) samples.

**Figure S6** Specific capacity and Coulombic efficiency derived from the respective 5<sup>th</sup> cycle at 0.1-3.2  $\text{A g}^{-1}$  of  $\text{MnF}_2$  1#-9# electrodes (A); cycling stability for 500 cycles at 2  $\text{A g}^{-1}$  of  $\text{MnF}_2$  1#-9# electrodes (B).

**Figure S7** CV plots of the first three cycles of  $\text{MnF}_2$  1#-9# electrodes at 0.3  $\text{mV s}^{-1}$ .

**Figure S8** GCD curves of the first five cycles for  $\text{MnF}_2$  (1#, 2#, 3#, 4#, 5#, 6#, 7#, 9#) electrodes at 0.1  $\text{A g}^{-1}$ .

**Figure S9** GCD curves of  $\text{MnF}_2$  1#-6# electrodes at 0.1-3.2  $\text{A g}^{-1}$ .

**Figure S10** GCD curves of  $\text{MnF}_2$  7#-9# and  $\text{MnF}_2$  8#-E electrodes at 0.1-3.2  $\text{A g}^{-1}$ .

**Figure S11** Rate performance and Coulombic efficiency of  $\text{MnF}_2$  1#-6# electrodes at 0.1-3.2-0.1  $\text{A g}^{-1}$ .

**Figure S12** Rate performance and Coulombic efficiency of  $\text{MnF}_2$  7#-9# and  $\text{MnF}_2$  8#-E electrodes at 0.1-3.2-0.1  $\text{A g}^{-1}$ .

**Figure S13** Cycling stability and Coulombic efficiency of  $\text{MnF}_2$  1#-6# electrodes at 2  $\text{A g}^{-1}$  for 500 cycles.

**Figure S14** Cycling stability and Coulombic efficiency of  $\text{MnF}_2$  7#-9# and  $\text{MnF}_2$  8#-E electrodes at 2  $\text{A g}^{-1}$  for 500 cycles.

**Figure S15** XRD patterns and TEM images of the  $\text{MnF}_2$  8# (A, C, E) and  $\text{MnF}_2$  8#-E (B, D, F) electrodes after the cycling for Li-ion storage.

**Figure S16** The pseudocapacitive contributions (the shaded region) of the  $\text{MnF}_2$  8# electrode at 0.1-0.3  $\text{mV s}^{-1}$  (a-c) and the contribution ratios (d) for Li-ion storage.

**Figure S17** The pseudocapacitive contributions (the shaded region) of the  $\text{MnF}_2$  8#-E electrode at 0.1-0.3  $\text{mV s}^{-1}$  (a-c) and the contribution ratios (d) for Li-ion storage.

**Figure S18** The equivalent circuit model of Nyquist plots for MnF<sub>2</sub> and MnF<sub>2</sub> 8#-E electrodes.

**Figure S19** Nyquist plots of MnF<sub>2</sub> and MnF<sub>2</sub> 8#-E electrodes (the insets are the enlarged high frequency regions).

**Figure S20** GCD curves of MnF<sub>2</sub> 8# (A) and MnF<sub>2</sub> 8#-E (B) electrodes at the precharged current density of 0.1 A g<sup>-1</sup>.

**Figure S21** Performance of AC electrode for Li-ion storage.

**Figure S22** CV plots at 40 mV s<sup>-1</sup> (A), GCD curves at 1 A g<sup>-1</sup> (B), Ragone plots (C) and cycling behavior for 5000 cycles at 5 A g<sup>-1</sup> (D) of 4.5 V-MnF<sub>2</sub>//AC LICs (1:1) and 4.6 V-MnF<sub>2</sub>//AC LICs (1:2).

**Figure S23** The third cycle of CV curves under 0-5 V at 1 mV s<sup>-1</sup>: MnF<sub>2</sub>//AC LICs (1:1) (A), MnF<sub>2</sub>//AC LICs (1:2) (B).

**Figure S24** CV plots of 4.5 V-MnF<sub>2</sub>//AC LICs (1:1) at 10-160 mV s<sup>-1</sup> (A), GCD curves of 4.5 V-MnF<sub>2</sub>//AC LICs (1:1) at 0.5-16 A g<sup>-1</sup> (B), CV plots of 4.6 V-MnF<sub>2</sub>//AC LICs (1:2) at 10-160 mV s<sup>-1</sup> (C), GCD curves of 4.6 V-MnF<sub>2</sub>//AC LICs (1:2) at 0.5-16 A g<sup>-1</sup> (D).

**Figure S25** CV plots at 40 mV s<sup>-1</sup> (A), GCD curves at 1 A g<sup>-1</sup> (B), Ragone plots (C) and cycling behavior for 5000 cycles at 5 A g<sup>-1</sup> (D) of 4 V-MnF<sub>2</sub>//AC LICs (1:1), (1:2) and (1:3).

**Figure S26** CV plots of 4 V-MnF<sub>2</sub>-E//AC LICs (1:1) (A), 4 V-MnF<sub>2</sub>-E//AC LICs (1:2) (C) and 4 V-MnF<sub>2</sub>-E//AC LICs (1:3) (E) at 10-160 mV s<sup>-1</sup>, GCD curves of 4 V-MnF<sub>2</sub>-E//AC LICs (1:1) (B), 4 V-MnF<sub>2</sub>-E//AC LICs (1:2) (D) and 4 V-MnF<sub>2</sub>-E//AC LICs (1:3) (F) at 0.5-16 A g<sup>-1</sup>.

**Figure S27** CV plots of 4 V-MnF<sub>2</sub>//AC LICs (1:1) (A) and 4.3 V-MnF<sub>2</sub>//AC LICs (1:1) (C) at 10-160 mV s<sup>-1</sup>, GCD curves of 4 V-MnF<sub>2</sub>//AC LICs (1:1) (B) and 4.3 V-MnF<sub>2</sub>//AC LICs (1:1) (D) at 0.5-16 A g<sup>-1</sup>.

**Figure S28** CV plots of 4.3 V-MnF<sub>2</sub>-E//AC LICs (1:2) (A), GCD curves of 4.3 V-MnF<sub>2</sub>-E//AC LICs (1:2) (B) at 0.5-16 A g<sup>-1</sup>.

**Figure S29** GCD curves of MnF<sub>2</sub> 8# (A) and MnF<sub>2</sub> 8#-E (B) at 0.1-1.6 A g<sup>-1</sup>.

**Figure S30** Rate performance and Coulombic efficiency of MnF<sub>2</sub> 8# (A) and MnF<sub>2</sub> 8#-E (B) electrodes at 0.1-1.6-0.1 A g<sup>-1</sup>, Cycling stability and Coulombic efficiency of MnF<sub>2</sub> 8# (C) and MnF<sub>2</sub> 8#-E (D) electrodes at 0.3 A g<sup>-1</sup> for 500 cycles.

**Figure S31** XRD patterns and TEM images of the MnF<sub>2</sub> 8# (A, C, E) and MnF<sub>2</sub> 8#-E (B, D, F) electrodes after the cycling for Na-ion storage.

**Figure S32** The pseudocapacitive contributions (the shaded region) of the MnF<sub>2</sub> 8# electrode at 0.1-0.3 mV s<sup>-1</sup> (a-c) and the contribution ratios (d) for Na-ion storage.

**Figure S33** The pseudocapacitive contributions (the shaded region) of the MnF<sub>2</sub> 8#-E electrode at 0.1-0.3 mV s<sup>-1</sup> (a-c) and the contribution ratios (d) for Na-ion storage.

**Figure S34** Nyquist plots of MnF<sub>2</sub> and MnF<sub>2</sub> 8#-E electrodes (the insets are the enlarged high frequency regions).

**Figure S35** GCD curves of MnF<sub>2</sub> 8# (A) and MnF<sub>2</sub> 8#-E (B) electrodes at the precharged current density of 0.1 A g<sup>-1</sup>

**Figure S36** Performance of AC electrode for Na-ion storage.

**Figure S37** CV plots at 40 mV s<sup>-1</sup> (A), GCD curves at 1 A g<sup>-1</sup> (B), Ragone plots (C) and cycling behavior for 5000 cycles at 3 A g<sup>-1</sup> (D) of 4.6 V-MnF<sub>2</sub>//AC NICs (1:1) and 4.8 V-MnF<sub>2</sub>//AC NICs (1:2).

**Figure S38** The third cycle CV curves at 1 mV s<sup>-1</sup> under 0-5 V: MnF<sub>2</sub>//AC NICs (1:1) (A), and MnF<sub>2</sub>//AC NICs (1:2) (B).

**Figure S39** CV plots of 4.6 V-MnF<sub>2</sub>//AC NICs (1:1) (A) and 4.8 V-MnF<sub>2</sub>//AC NIC (1:2) (C), at 10-160 mV s<sup>-1</sup>, GCD curves of 4.6 V-MnF<sub>2</sub>//AC NIC (1:1) (B) and 4.8 V-MnF<sub>2</sub>//AC NICs (1:2) (D) at 0.5-8 A g<sup>-1</sup>.

**Figure S40** CV plots of 4 V-MnF<sub>2</sub>//AC NICs (1:1) (A) and 4.3 V-MnF<sub>2</sub>//AC NICs (1:1) (C), at 10-160 mV s<sup>-1</sup>, GCD curves of 4 V-MnF<sub>2</sub>//AC NICs (1:1) (B) and 4.3 V-MnF<sub>2</sub>//AC NICs (1:1) (D) at 0.5-8 A g<sup>-1</sup>.

**Figure S41** CV plots of 4 V-MnF<sub>2</sub>-E//AC NICs (1:1) (A) and 4.3 V-MnF<sub>2</sub>-E//AC NICs (1:1) (C) at 10-160 mV s<sup>-1</sup>, GCD curves of 4 V-MnF<sub>2</sub>-E//AC NICs (1:1) (B) and 4.3 V-MnF<sub>2</sub>-E//AC NICs (1:1) (D) at 0.5-8 A g<sup>-1</sup>.

**Table S1** Orthogonal experimental design.

**Table S2** Synthesis condition of MnF<sub>2</sub> 1#-9#.

**Table S3** Orthogonal experimental analysis results of MnF<sub>2</sub>

**Table S4** Summary of performance of MnF<sub>2</sub> 1#-9# and MnF<sub>2</sub> 8#-E electrodes.

**Table S5** A comparasion for Mn-O-F (MnF<sub>2</sub> 8#-E) anode with literature for LIBs.

**Table S6** EIS parameters of MnF<sub>2</sub> and MnF<sub>2</sub> 8#-E electrodes for Li-ion storage.

**Table S7** Summary of performance of MnF<sub>2</sub>//AC and MnF<sub>2</sub>-E//AC LICs and NICs.

**Table S8** Electrochemical performance comparison for some reported LICs.

**Table S9** EIS parameters of MnF<sub>2</sub> 8# and MnF<sub>2</sub> 8#-E electrodes for Na-ion storage.

**Table S10** Electrochemical performance comparison for some reported NICs.

**Table S11** Chemicals, agents and materials.

**References**

## Experimental

### Synthesis of materials

The  $\text{MnF}_2$  materials were synthesized by one-pot solvothermal method according to the orthogonal experiment (**Table S1, S2**). Take the procedure of  $\text{MnF}_2$  8# for an example. The compounds of 4 mmol  $\text{Mn}(\text{CH}_3\text{COO})_2 \cdot 4\text{H}_2\text{O}$  and 7 mL HF (40%) were added into 30 mL ethylene glycol (EG) solvents, and the mixture was magnetically stirred thoroughly and dispersed well in an ultrasonic bath. Subsequently, the mixture was put into a 50 mL Teflon lined stainless steel reactor, which was heated at 190 °C for 6 h in an electric oven, and cooled down naturally. Then, the yielded precipitates were washed with absolute alcohol several times and collected by centrifugal filtration. Finally, the collected precipitates were dried overnight at 100 °C to obtain the ultimate products. The other eight  $\text{MnF}_2$  samples were also synthesized as the procedure described above based on the specific orthogonal experiment conditions.

The Mn-O-F ( $\text{MnF}_2$  8#-E) materials were synthesized by a simple etching method as follows: 100 mg of  $\text{MnF}_2$  8# was added into 1 M  $\text{NaBH}_4$  aqueous solution with continuous stirring for 1 h, next, the mixture was centrifuged with distilled water and absolute alcohol in turn for several times, and then the precipitates were placed in a drying oven at 100 °C for 12 h to obtain the Mn-O-F materials. The possible process for the formation of Mn-O-F ultrafine nanowires can be seen in the **Scheme 1** (ESI) (the chemicals in the experiment can be seen in the **Table S11**).

### Characterizations

The phases and crystallinity properties were determined by X-ray diffraction (XRD). The surface chemical compositions and electronic structures were checked by X-ray photoelectron spectra (XPS). The morphology and size of particles were analyzed by scanning electron microscopy (SEM) and transmission electron microscopy (TEM). The crystalline microstructures were resolved by the high-resolution TEM (HRTEM) and selected area electron diffraction (SAED). The element composition and distribution were measured by X-Ray energy dispersive spectra (EDS) and mapping. The chemical functional groups were measured by Fourier transform infrared spectroscopy (FTIR). The specific surface area, pore volume and size distribution were examined by nitrogen isothermal sorptions with Brunauer-Emmett-Teller (BET) and Barrett-Joyner-Halenda (BJH) methods.

## Electrochemical measurements

The electrodes were prepared as follows: firstly, a well-dispersed mixture of 70 wt% active materials (as-synthesized  $\text{MnF}_2$  (1#-9# and 8#-E) or commercial activated carbon (AC), 20 wt% AB conductive agent and 10 wt% polyvinylidene fluoride (PVDF) binder dissolved into the N-methyl-2-pyrrolidone (NMP)) were casted onto the current collectors (the collectors for anode and cathode are Cu foil and carbon-coated Al foil respectively, with the thickness of 15  $\mu\text{m}$ ), and followed by drying in a vacuum oven at 110  $^{\circ}\text{C}$  for 12 h; Secondly, the electrodes were punched into disks with diameter of 12 mm, and the mass loading of active materials was about 1-4  $\text{mg cm}^{-2}$ . The electrochemical performances were examined by cyclic voltammetry (CV), galvanostatic charge/discharge (GCD) and electrochemical impedance spectroscopy (EIS) tests via CHI 660E electrochemical working stations and Neware-CT-4008 testers. Tests for  $\text{Li//MnF}_2$  (1#-9# and 8#-E) and  $\text{Li//AC}$  or  $\text{Na//MnF}_2$  (8# and 8#-E) and  $\text{Na//AC}$  half-cells were conducted by using the type 2032 coin cells with a  $\text{MnF}_2$  or AC working electrode (WE), a Li or Na plate as both counter electrode (CE) and reference electrode (RE), and one piece of glass fiber (GF) as separator. Tests for  $\text{MnF}_2$  (8# and 8#-E)//AC LICs/NICs full-cells were conducted via type 2032 coin cells, with certain active mass ratio of anode and cathode, and the  $\text{MnF}_2$  (8# and 8#-E) anodes were precharged (pre-lithiation or pre-sodiation) at 0.1  $\text{A g}^{-1}$  for 3.5 cycles. The electrolytes for  $\text{Li//MnF}_2$  (1#-9# and 8#-E) and  $\text{Li//AC}$  half-cells and  $\text{MnF}_2$  (8# and 8#-E)//AC LICs were 1 M  $\text{LiPF}_6$  dissolved in the mixed solvents of ethylene carbonate (EC), ethyl methyl carbonate (EMC) and dimethyl carbonate (DMC) (1:1:1 in volume) with 1% vinylene carbonate (VC) additives (CAPCHEM); The electrolytes for  $\text{Na//MnF}_2$  (8# and 8#-E) and  $\text{Na//AC}$  half-cells and  $\text{MnF}_2$  (8# and 8#-E)//AC NICs were 0.85 M  $\text{NaPF}_6$  dissolved in the mixed solvents of EC, and dimethyl carbonate (DEC) (1:1 in volume) with 5% fluoroethylene carbonate (FEC) additives (MJS). All cell assemblies were performed in an high pure Ar-filled dry glovebox (MIKROUNA,  $\text{O}_2$  and  $\text{H}_2\text{O}$  < 0.1 ppm), and all tests were carried out at room temperature (about 25  $^{\circ}\text{C}$ ). The chemicals, agents and materials for electrochemical tests are listed in the **Table S11**. The calculations for the specific capacity ( $C_m$ ,  $\text{mAh g}^{-1}$ ), energy density ( $E_m$ ,  $\text{Wh kg}^{-1}$ ) and power density ( $P_m$ ,  $\text{kW kg}^{-1}$ ) are on the basis of **Equations S(1), (2) and (3)**:

$$C_m = Q/3.6m \quad \text{S(1)}$$

$$E_m = (C_m \Delta V)/2 \quad \text{S(2)}$$

$$P_m = 3.6E_m/t \quad \text{S(3)}$$

Where  $m$ ,  $Q$ ,  $\Delta V$ , and  $t$  are mass of active materials (g, for LICs and NICs, it refers to the total masses of active materials of anode and cathode), charge quantity (C), voltage window (V), and discharge time (s), respectively.

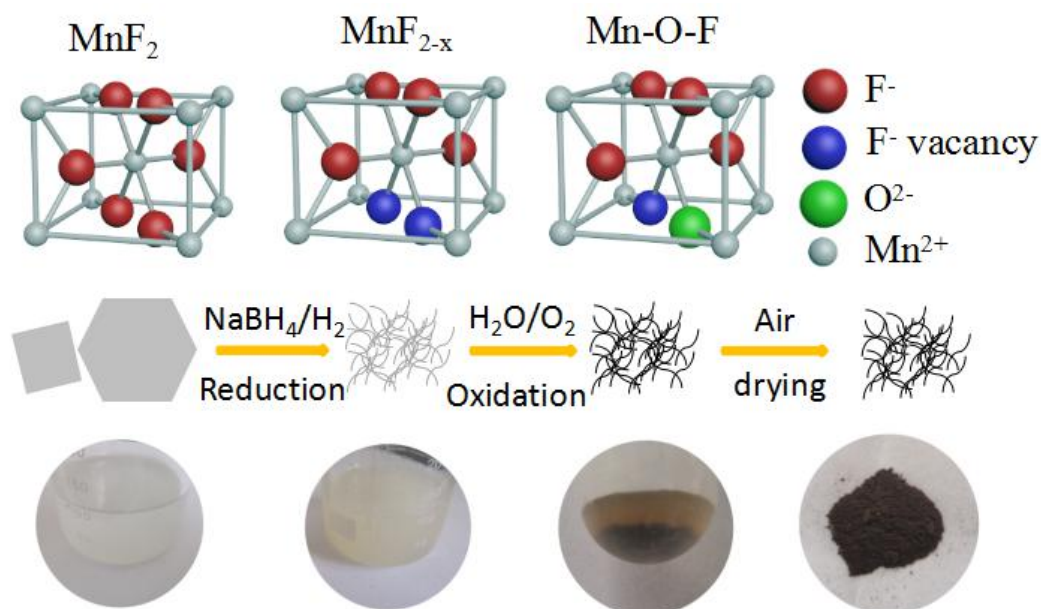

**Scheme S1** Schematics of the process for the formation of Mn-O-F ultrafine nanowires.

The possible process for the formation of Mn-O-F ultrafine nanowires can be seen in the **Scheme 1** (ESI). In the etching process by  $\text{NaBH}_4$  solutions, the bonds among crystalline particles would be weakened and the crystals would become more porous and linear and finally form nanowire morphology under the continuous impact of  $\text{H}_2$  flow, meanwhile, the  $\text{Mn}^{2+}$  would be partially reduced to unstable  $\text{Mn}^+$  in the  $\text{MnF}_2$  nanocrystal and produce the  $\text{F}^-$  vacancy; during the centrifugal filtration, with the removal of the excess of  $\text{NaBH}_4$  solutions, the unstable  $\text{Mn}^+$  in the  $\text{MnF}_2$  nanocrystal would be oxidized to stable  $\text{Mn}^{2+}$  by  $\text{O}_2$  in air and the  $\text{O}^{2-}$  would also partially occupy the position of  $\text{F}^-$  vacancy and finally form the Mn-O-F nanowires with the hetero oxygen doping and fluorine vacancies double defects.

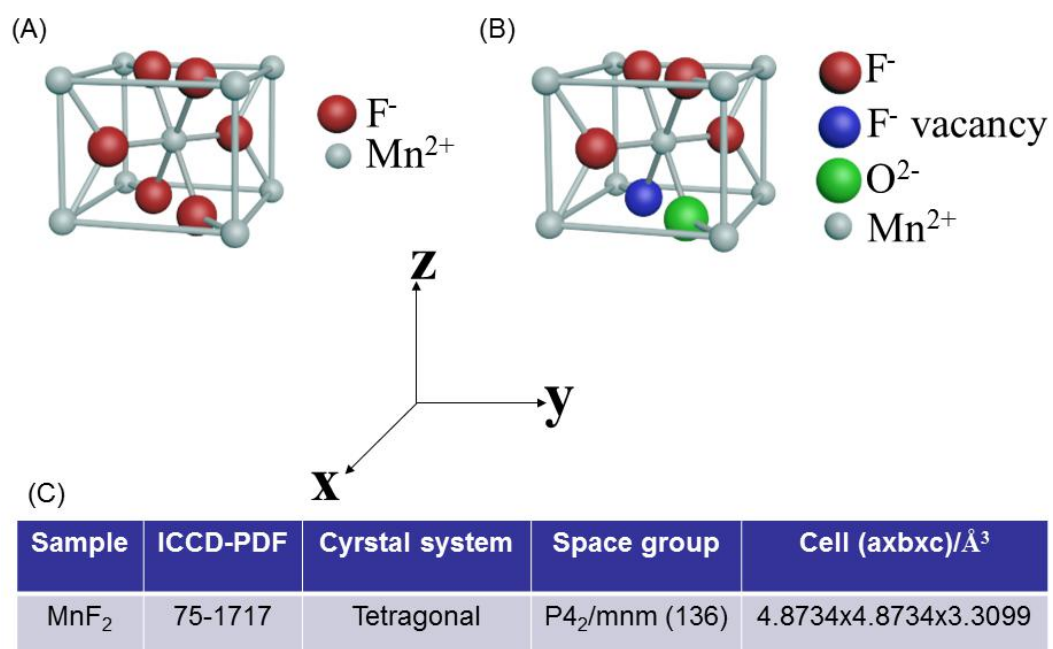

**Figure S1** The crystal structures of tetragonal MnF<sub>2</sub> (A) and defective MnF<sub>2</sub>-E (B) and detailed crystalline parameters for tetragonal MnF<sub>2</sub> (C).



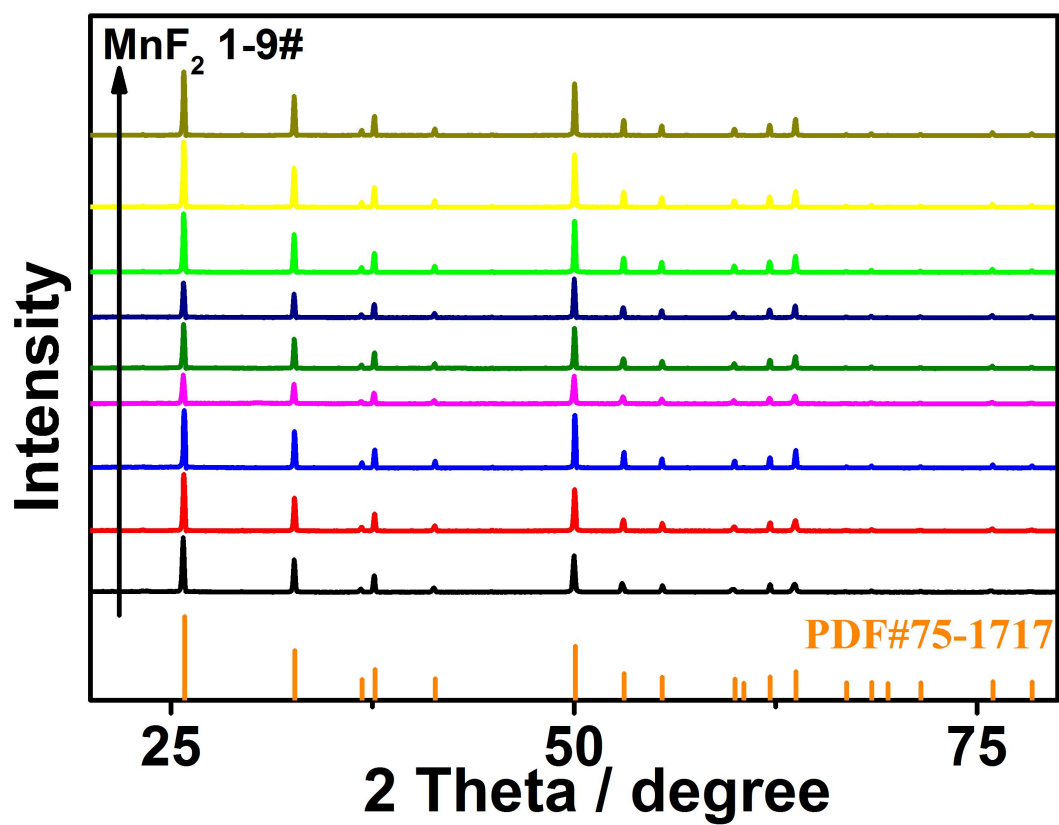

**Figure S2** XRD patterns of  $\text{MnF}_2$  1#-9# samples.

(A)

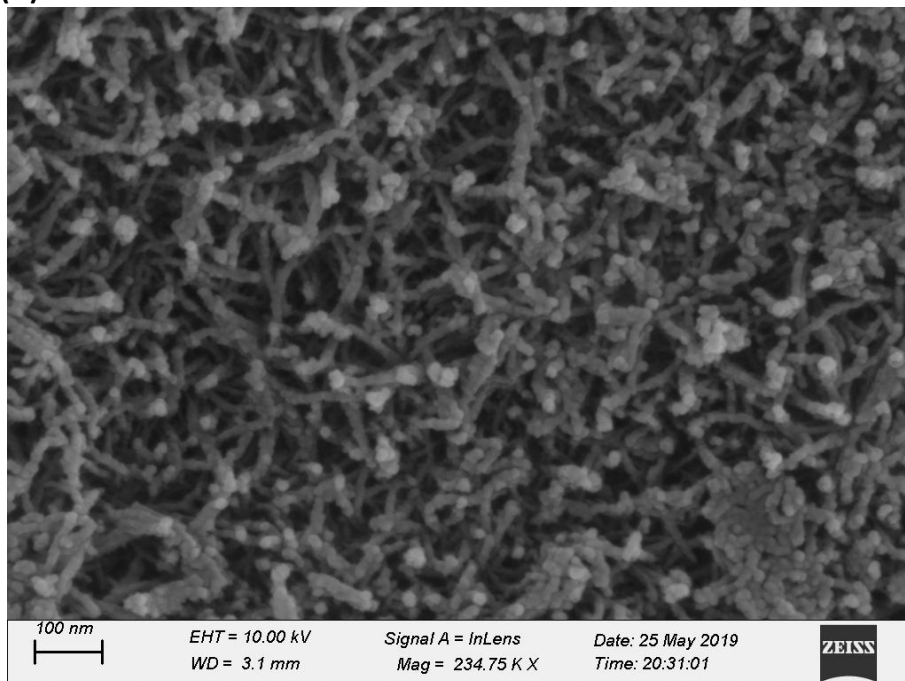

(B)

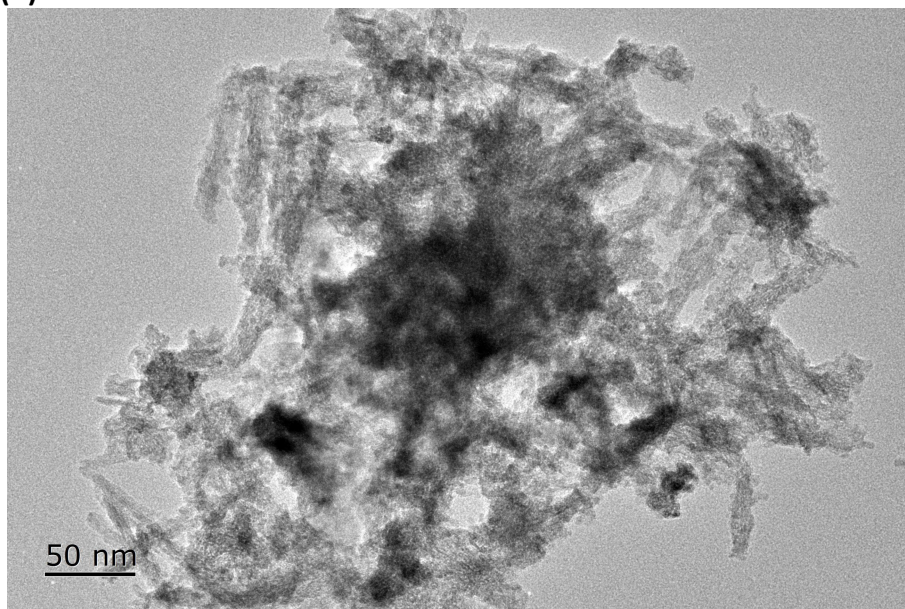

**Figure S3** SEM (A)/TEM (B) images of MnF<sub>2</sub> 8#-E sample.

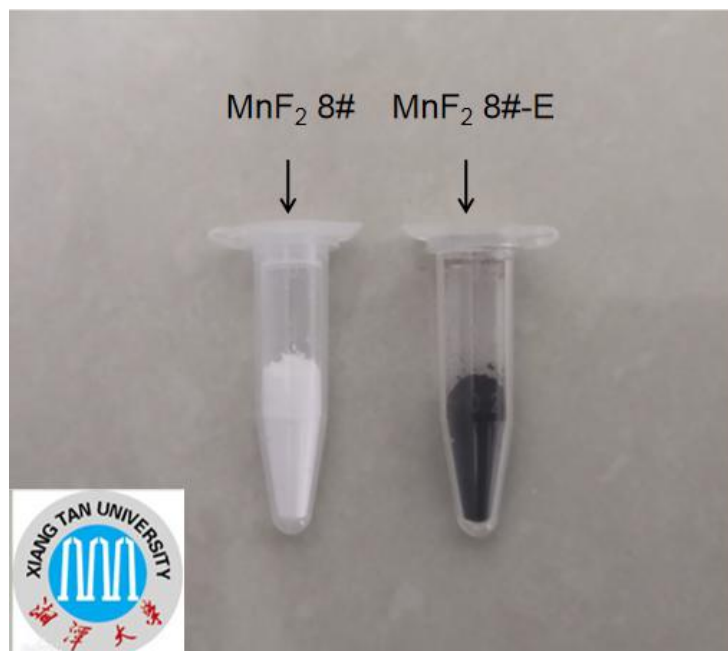

**Figure S4** A picture of  $\text{MnF}_2$  8# and  $\text{MnF}_2$  8#-E samples.

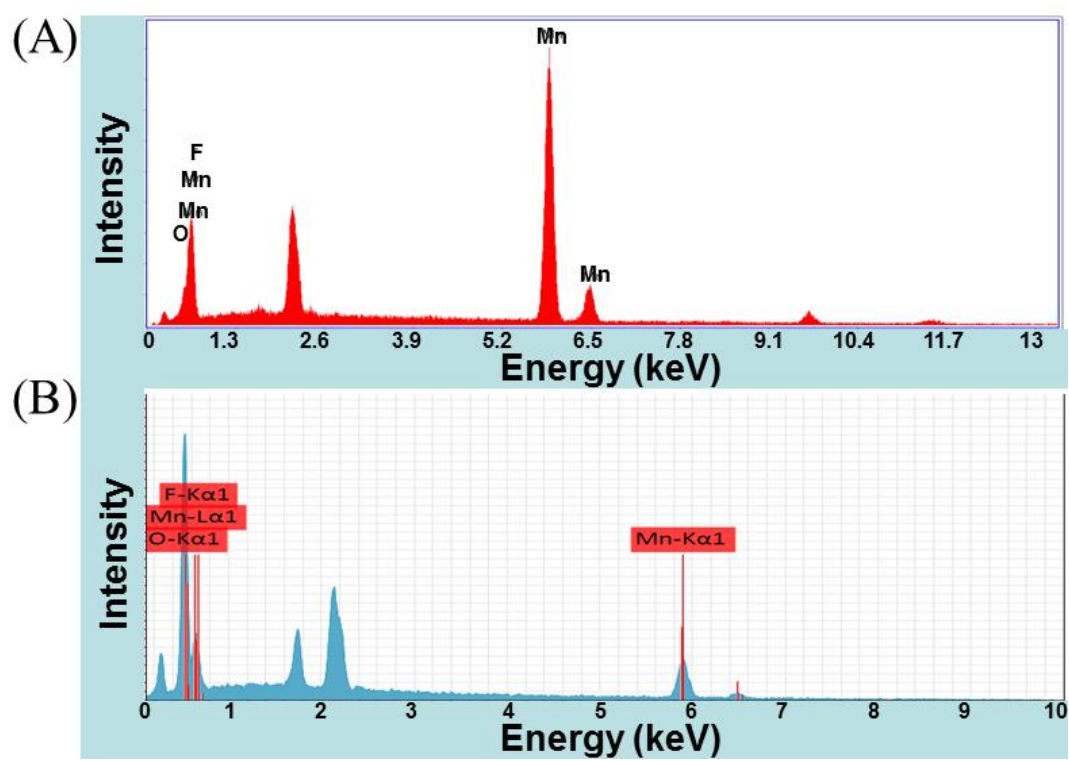

**Figure S5** EDS spectra of MnF<sub>2</sub> 8# (A) and MnF<sub>2</sub> 8#-E (B) samples.

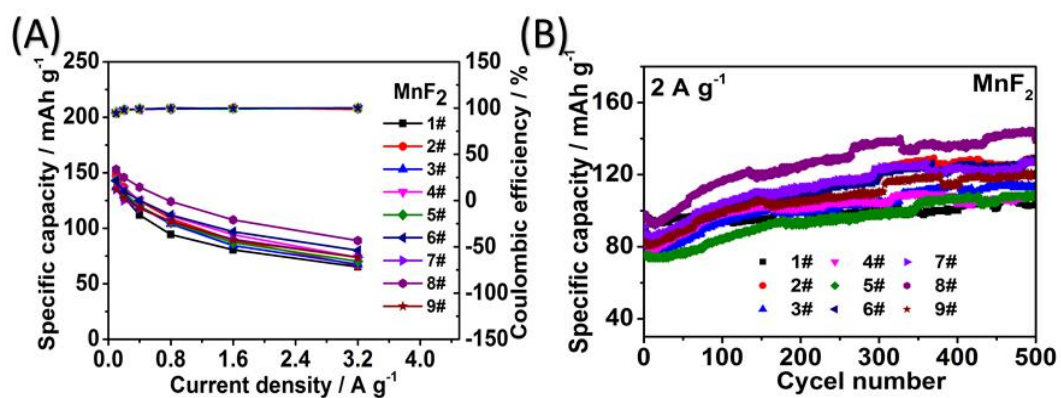

**Figure S6** Specific capacity and Coulombic efficiency derived from the respective 5<sup>th</sup> cycle at 0.1-3.2 A g<sup>-1</sup> of MnF<sub>2</sub> 1#-9# electrodes (A); cycling stability for 500 cycles at 2 A g<sup>-1</sup> of MnF<sub>2</sub> 1#-9# electrodes (B).

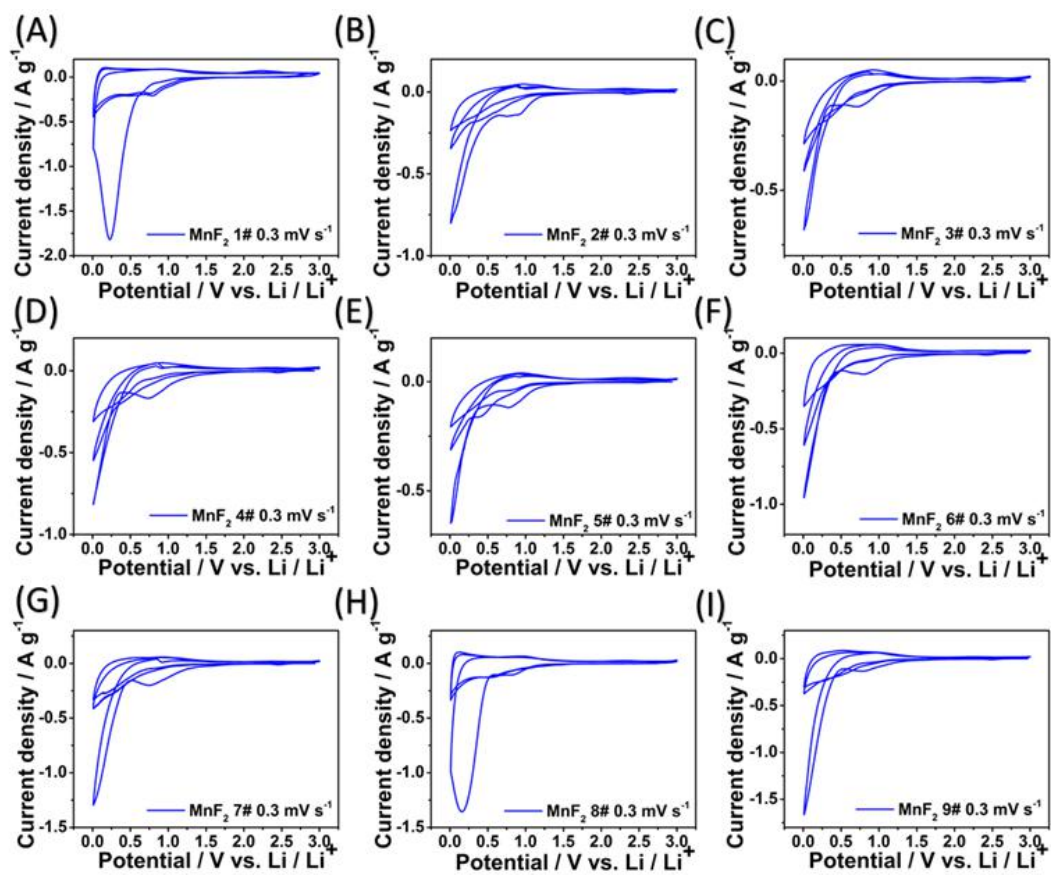

**Figure S7** CV plots of the first three cycles of  $\text{MnF}_2$  1#-9# electrodes at  $0.3 \text{ mV s}^{-1}$ .

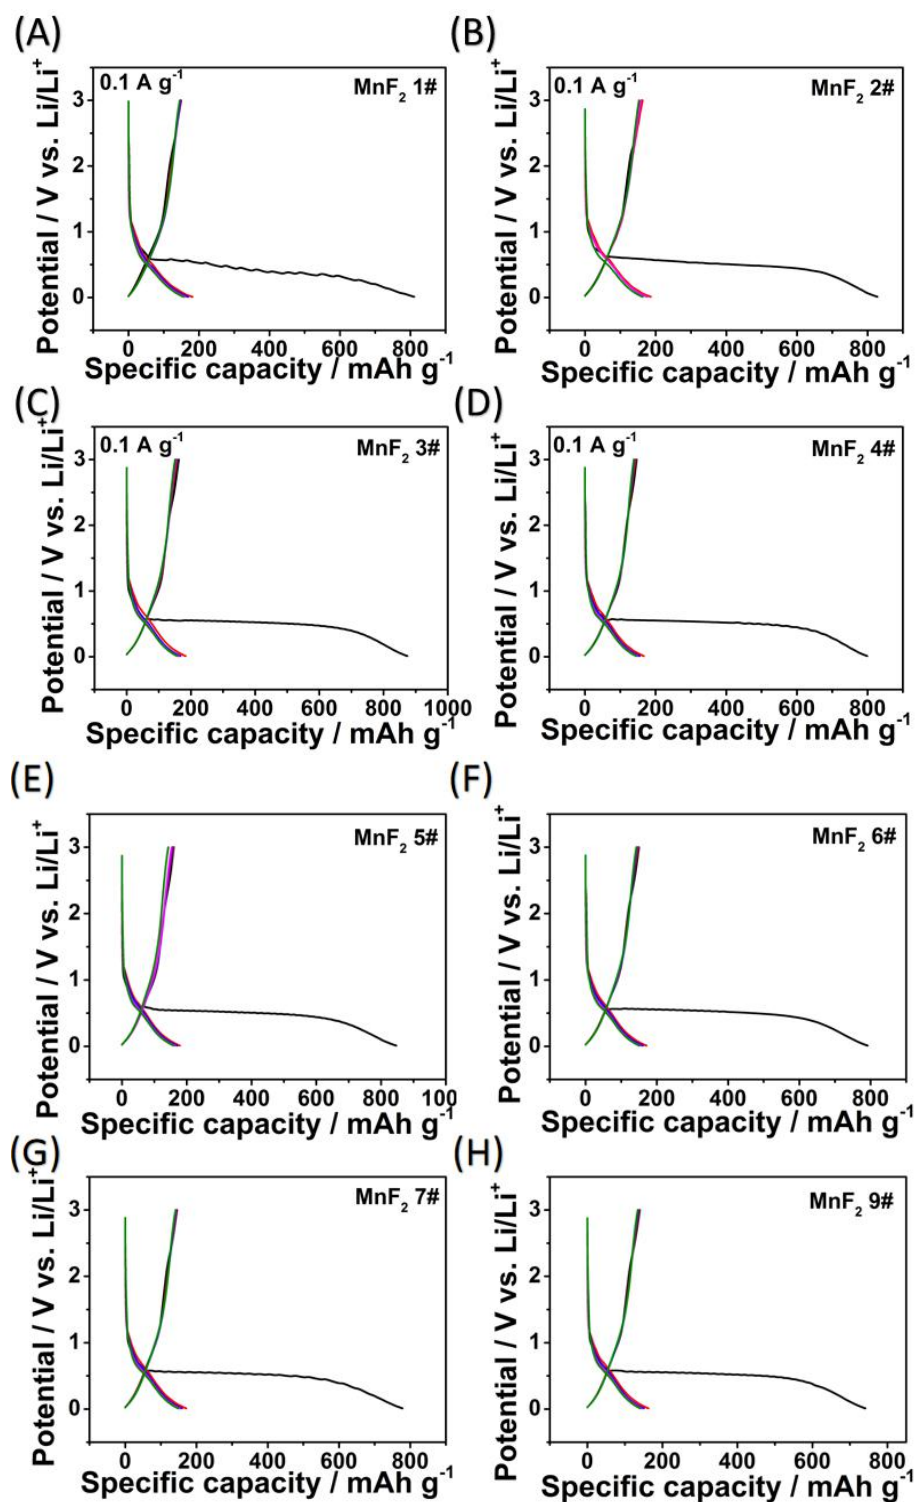

**Figure S8** GCD curves of the first five cycles for  $\text{MnF}_2$  (1#, 2#, 3#, 4#, 5#, 6#, 7#, 9#) electrodes at  $0.1 \text{ A g}^{-1}$ .



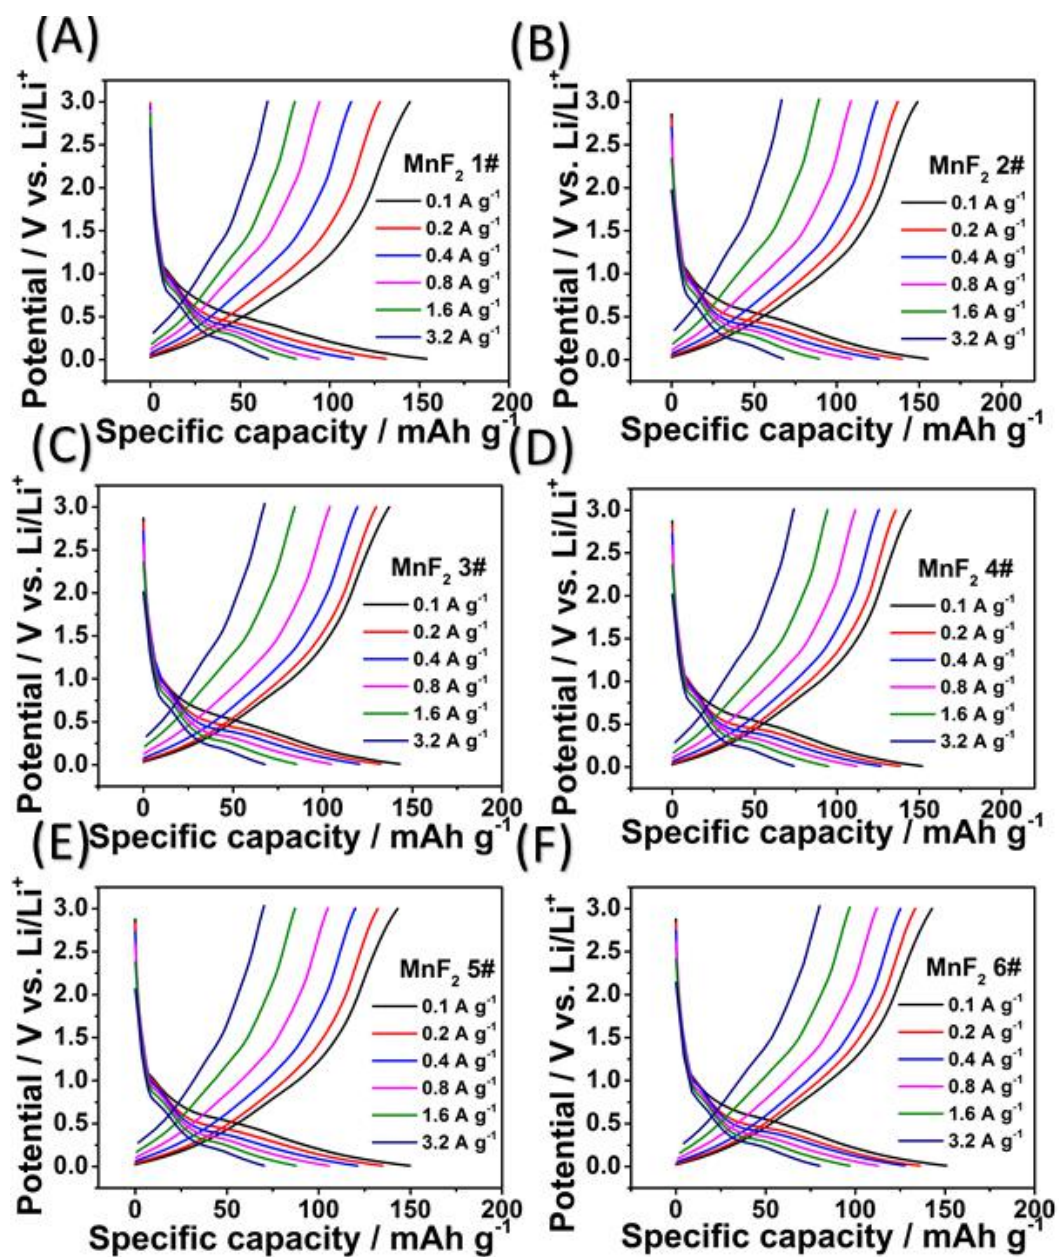

**Figure S9** GCD curves of MnF<sub>2</sub> 1#-6# electrodes at 0.1-3.2 A g<sup>-1</sup>.



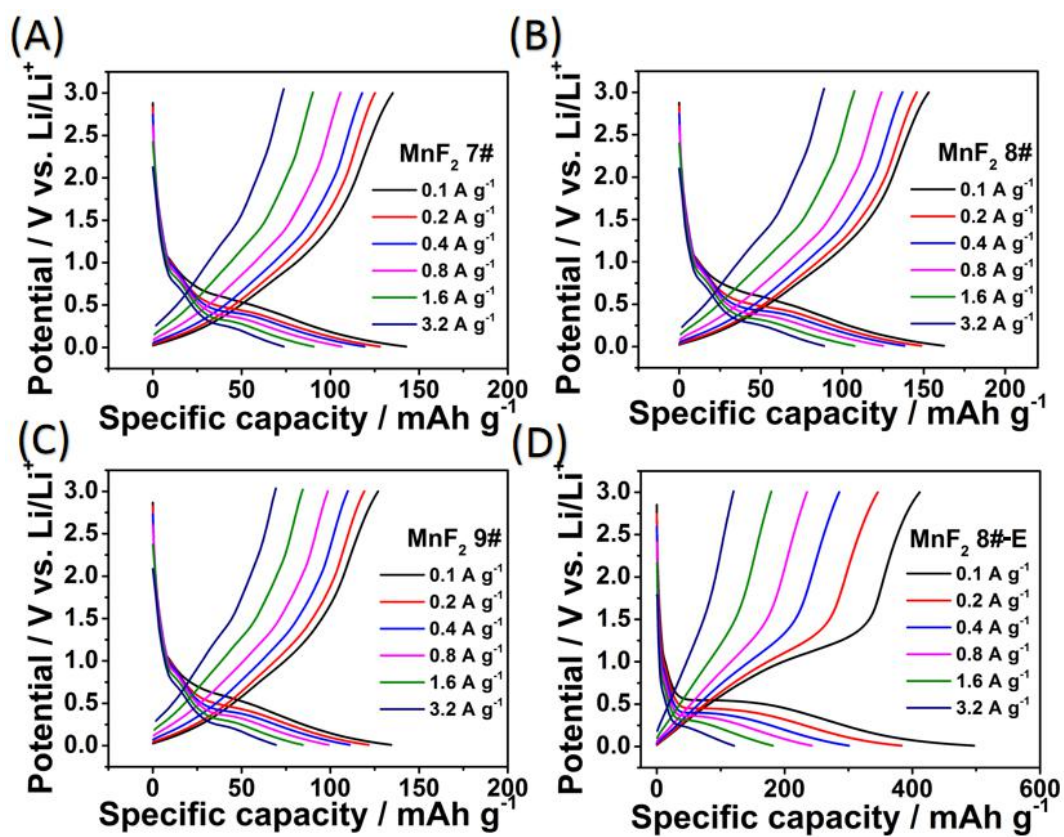

**Figure S10** GCD curves of MnF<sub>2</sub> 7#-9# and MnF<sub>2</sub> 8#-E electrodes at 0.1-3.2 A g<sup>-1</sup>.

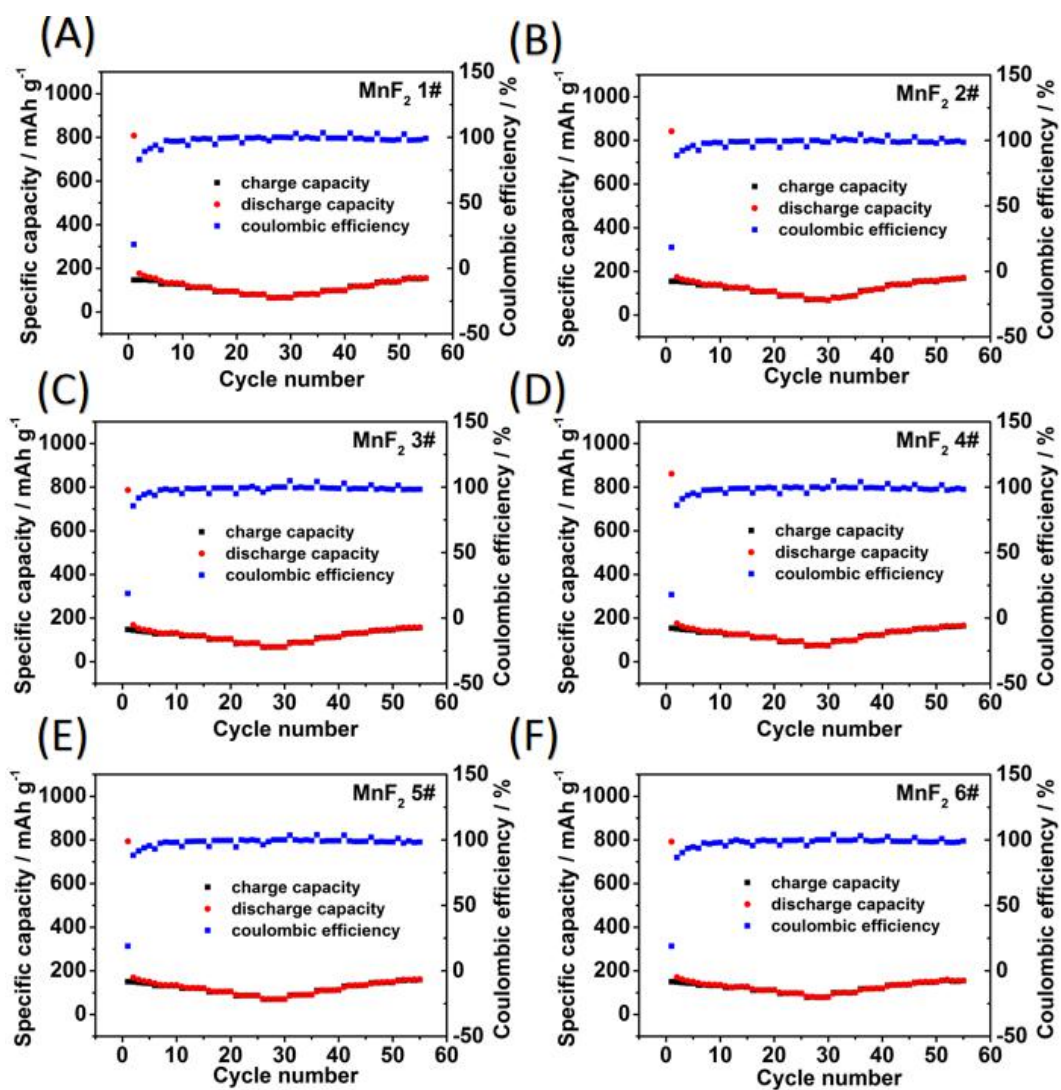

**Figure S11** Rate performance and Coulombic efficiency of MnF<sub>2</sub> 1#-6# electrodes at 0.1-3.2-0.1 A g<sup>-1</sup>.

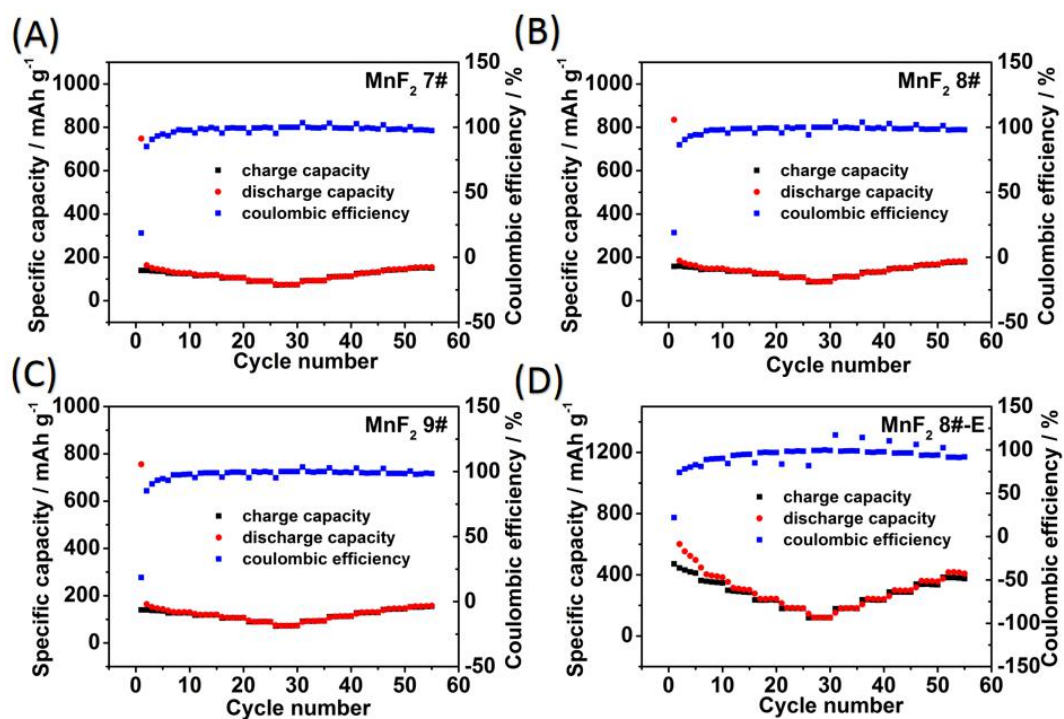

**Figure S12** Rate performance and Coulombic efficiency of  $\text{MnF}_2$  7#-9# and  $\text{MnF}_2$  8#-E electrodes at 0.1-3.2-0.1  $\text{A g}^{-1}$ .

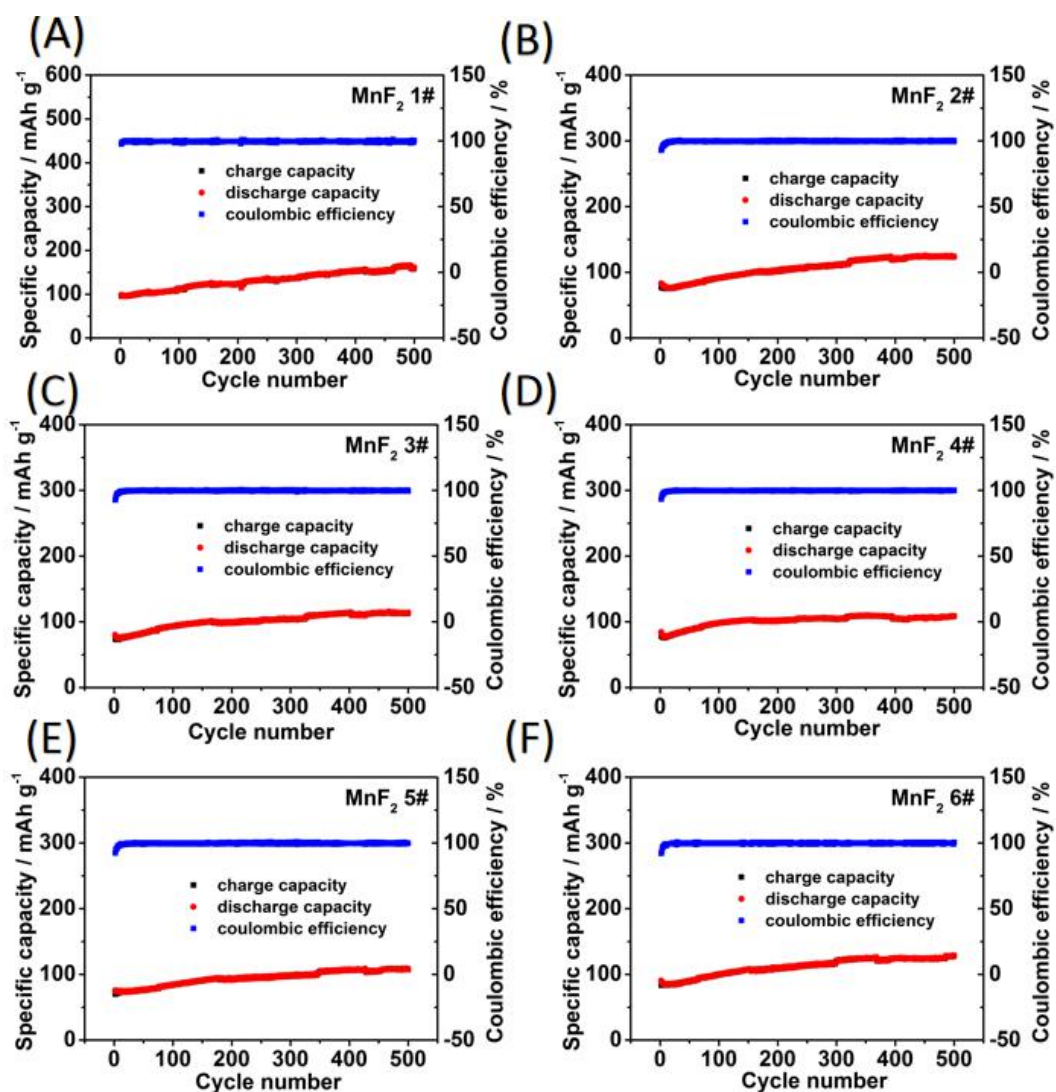

**Figure S13** Cycling stability and Coulombic efficiency of MnF<sub>2</sub> 1#-6# electrodes at 2 A g<sup>-1</sup> for 500 cycles.

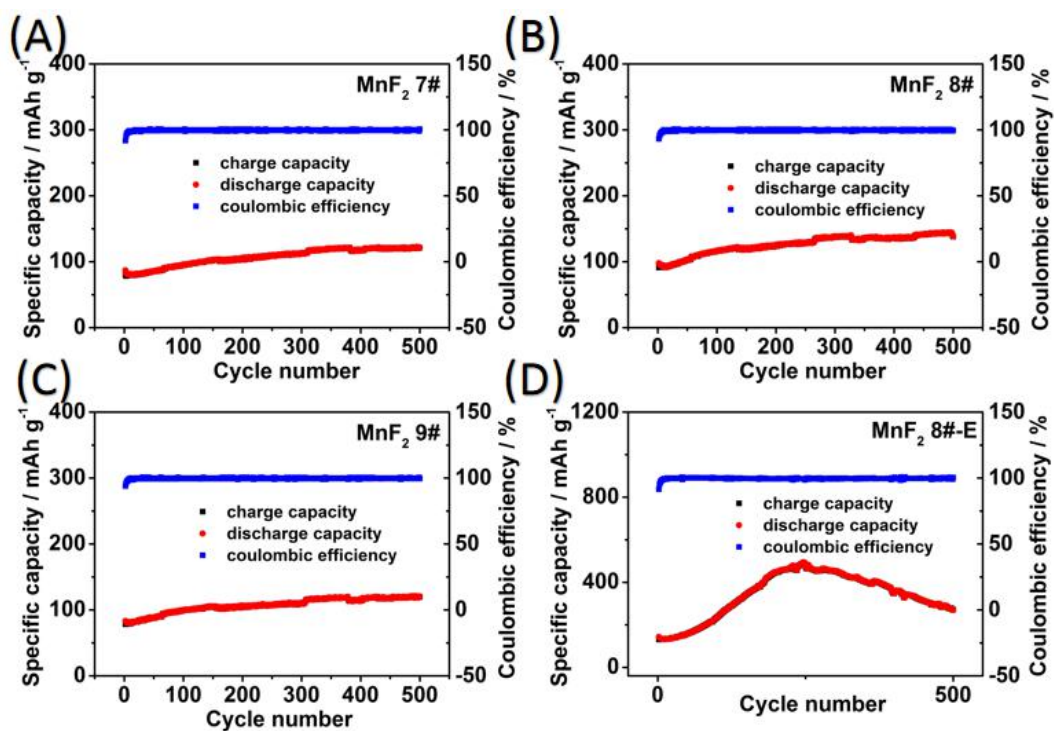

**Figure S14** Cycling stability and efficiency efficiency of  $\text{MnF}_2$  7#-9# and  $\text{MnF}_2$  8#-E electrodes at  $2 \text{ A g}^{-1}$  for 500 cycles.



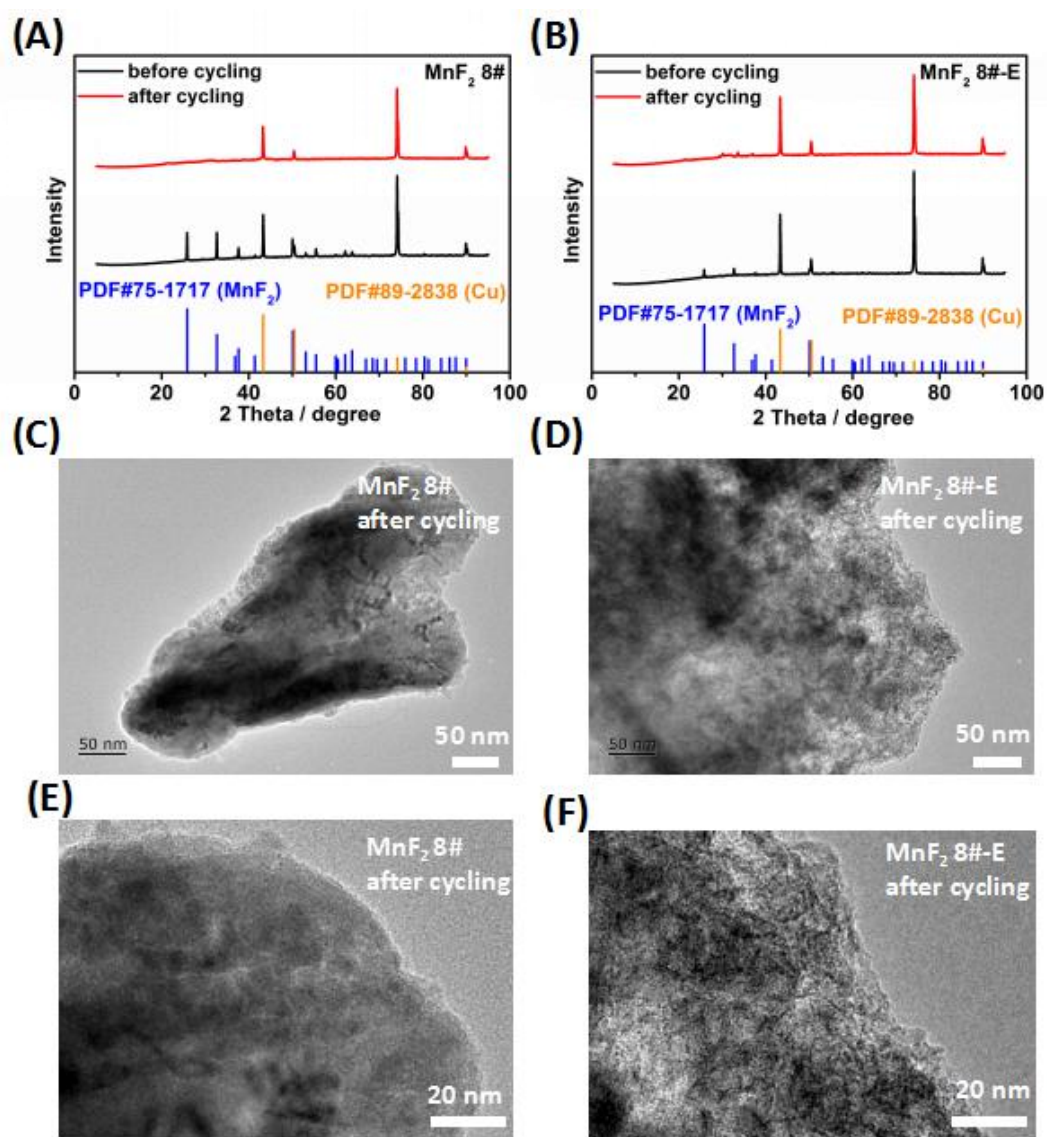

**Figure S15** XRD patterns and TEM images of the  $\text{MnF}_2$  8# (A, C, E) and  $\text{MnF}_2$  8#-E (B, D, F) electrodes after the cycling for Li-ion storage.

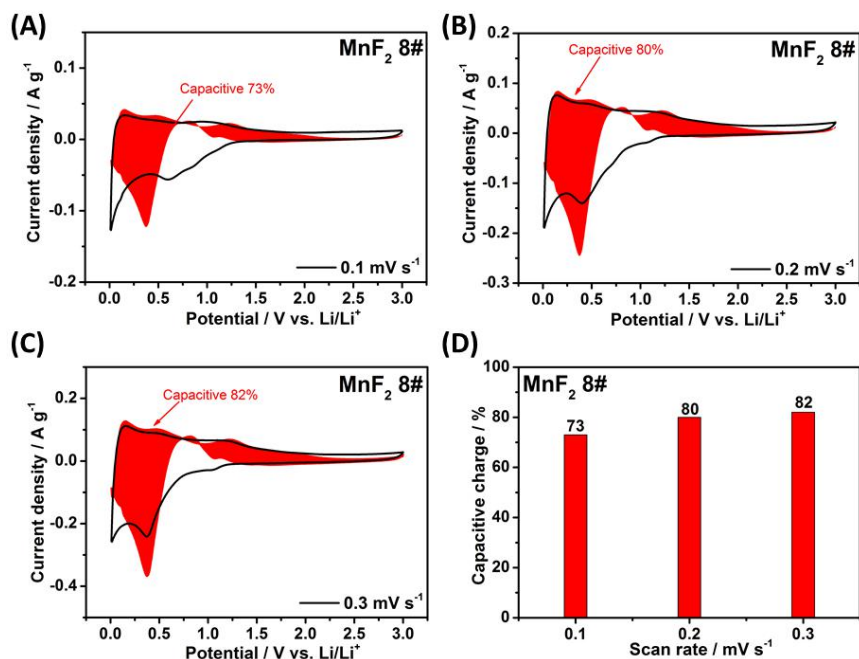

**Figure S16** The pseudocapacitive contributions (the shaded region) of the  $\text{MnF}_2$  8# electrode at 0.1-0.3  $\text{mV s}^{-1}$  (a-c) and the contribution ratios (d) for Li-ion storage.

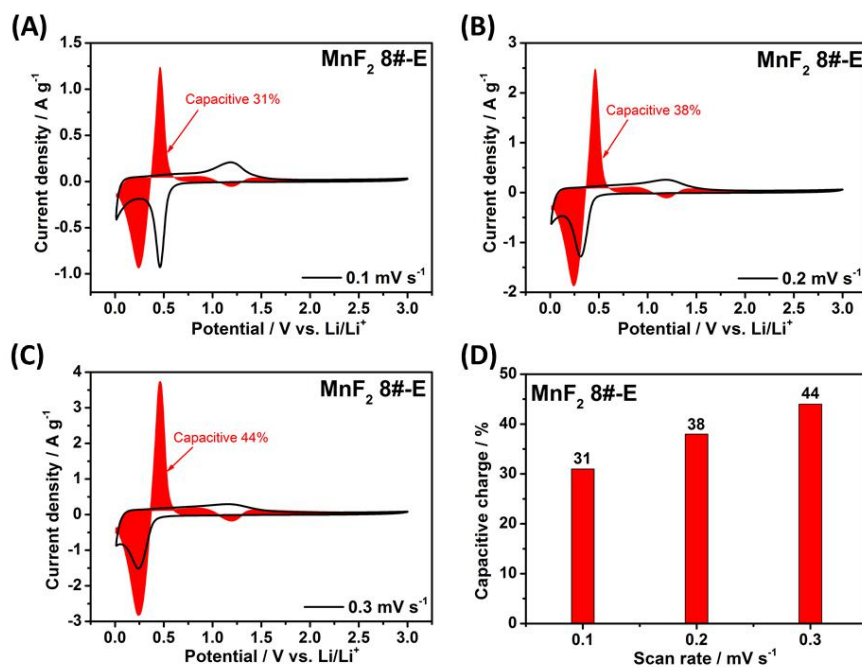

**Figure S17** The pseudocapacitive contributions (the shaded region) of the  $\text{MnF}_2$  8#-E electrode at 0.1-0.3  $\text{mV s}^{-1}$  (a-c) and the contribution ratios (d) for Li-ion storage.

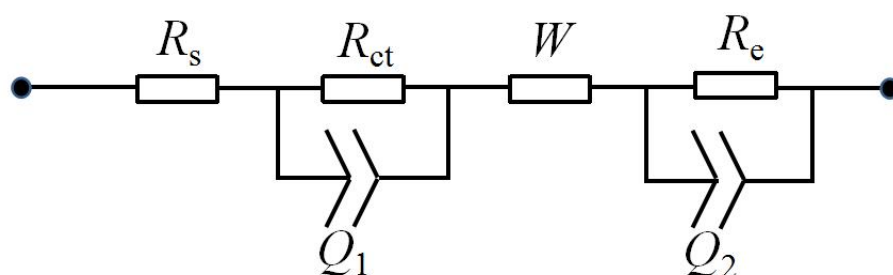

**Figure S18** The equivalent circuit model of Nyquist plots for  $\text{MnF}_2$  and  $\text{MnF}_2$  8#-E electrodes.



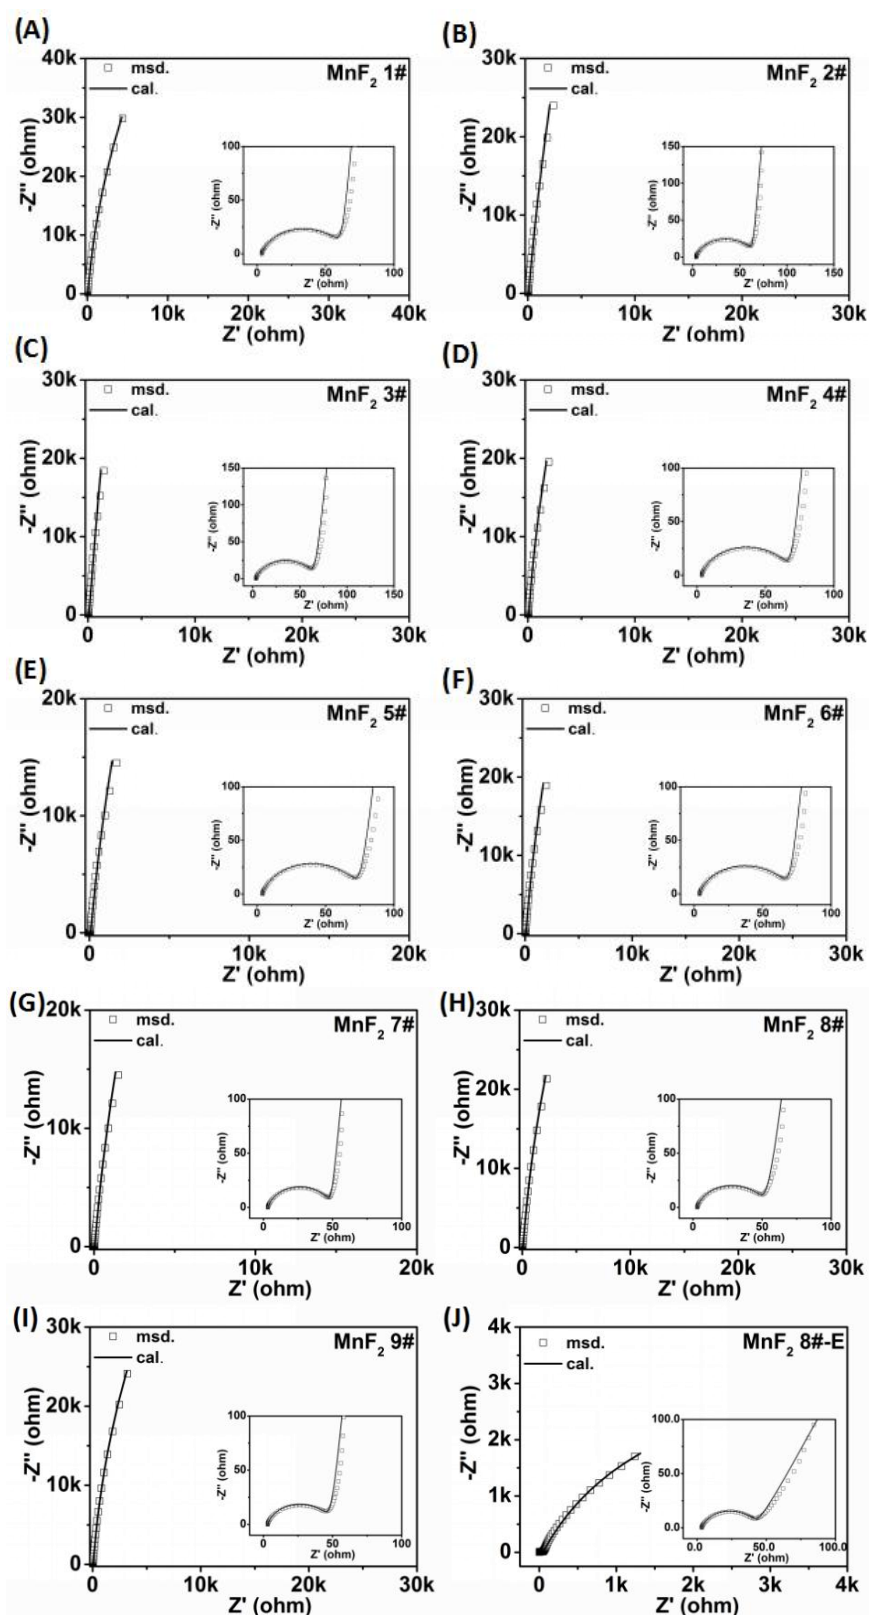

**Figure S19** Nyquist plots of  $\text{MnF}_2$  and  $\text{MnF}_2$  8#-E electrodes (the insets are the enlarged high frequency regions).

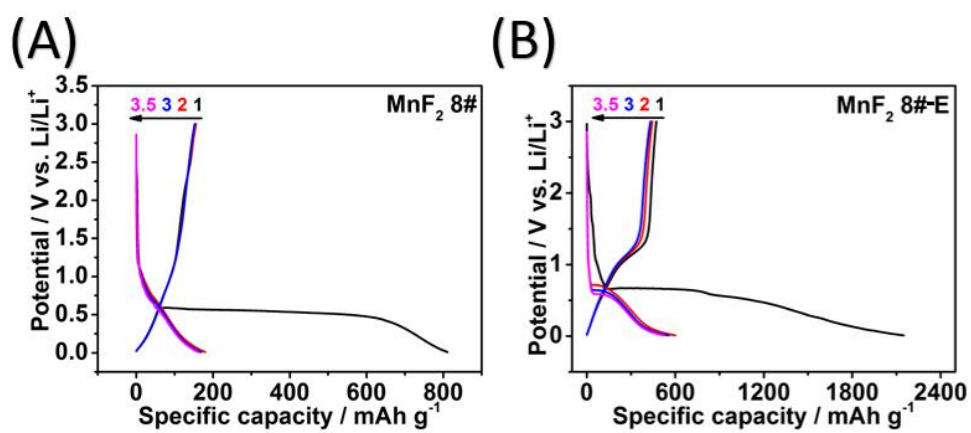

**Figure S20** GCD curves of  $\text{MnF}_2$  8# (A) and  $\text{MnF}_2$  8#-E (B) electrodes at the precharged current density of  $0.1 \text{ A g}^{-1}$ .

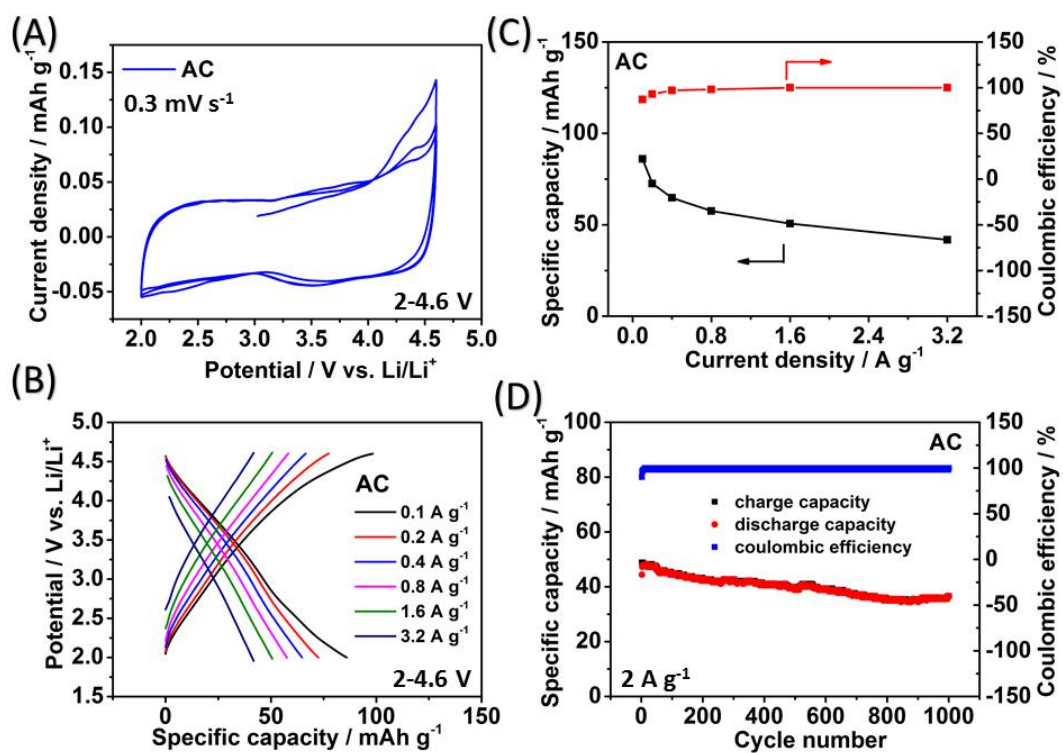

**Figure S21** Performance of AC electrode for Li-ion storage.

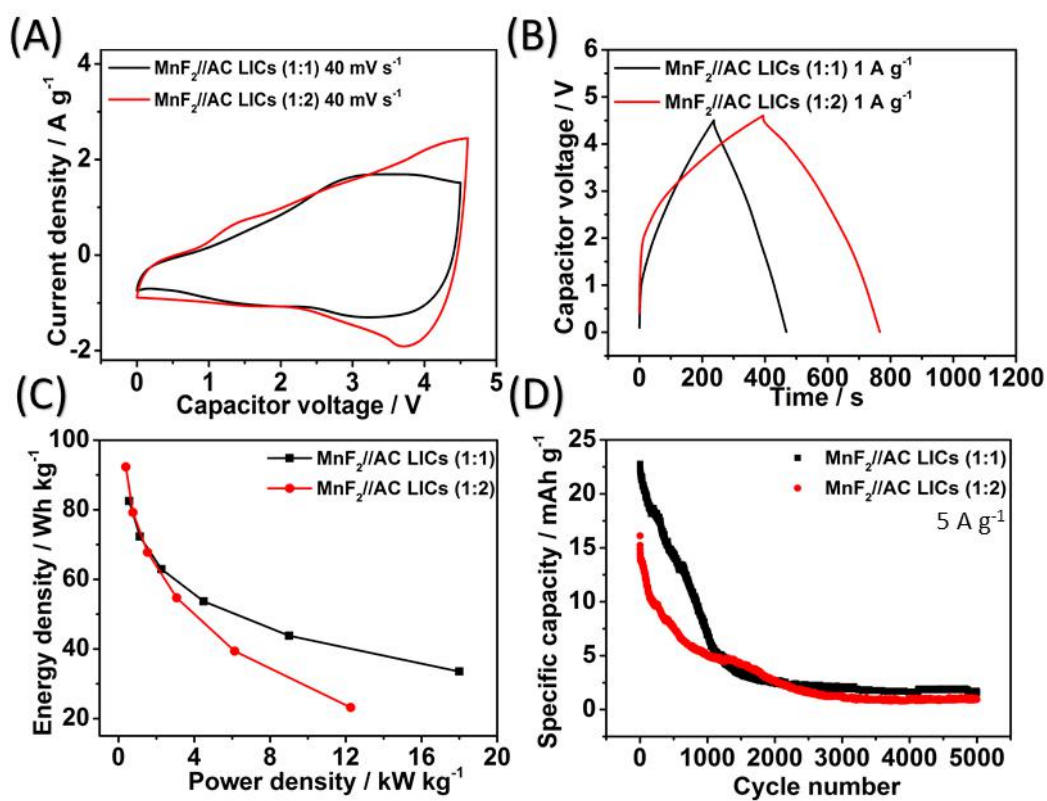

**Figure S22** CV plots at  $40 \text{ mV s}^{-1}$  (A), GCD curves at  $1 \text{ A g}^{-1}$  (B), Ragone plots (C) and cycling behavior for 5000 cycles at  $5 \text{ A g}^{-1}$  (D) of 4.5 V- $\text{MnF}_2/\text{AC}$  LICs (1:1) and 4.6 V- $\text{MnF}_2/\text{AC}$  LICs (1:2).

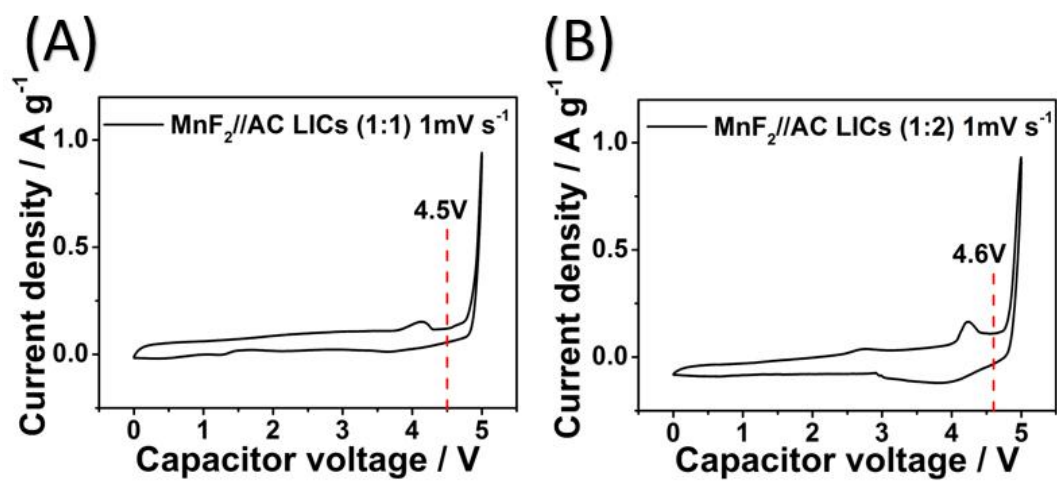

**Figure S23** The third cycle of CV curves under 0-5 V at 1 mV s<sup>-1</sup>: MnF<sub>2</sub>//AC LICs (1:1) (A), MnF<sub>2</sub>//AC LICs (1:2) (B).

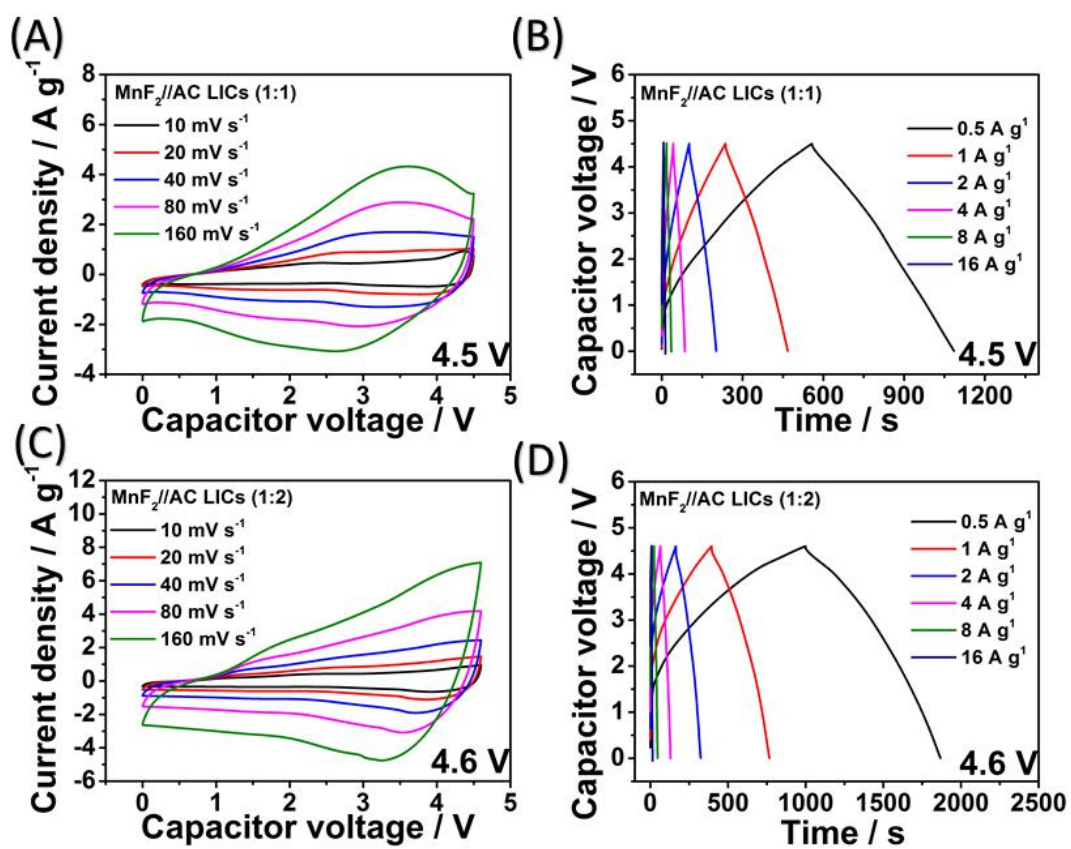

**Figure S24** CV plots of 4.5 V-MnF<sub>2</sub>//AC LICs (1:1) at 10-160 mV s<sup>-1</sup> (A), GCD curves of 4.5 V-MnF<sub>2</sub>//AC LICs (1:1) at 0.5-16 A g<sup>-1</sup> (B), CV plots of 4.6 V-MnF<sub>2</sub>//AC LICs (1:2) at 10-160 mV s<sup>-1</sup> (C), GCD curves of 4.6 V-MnF<sub>2</sub>//AC LICs (1:2) at 0.5-16 A g<sup>-1</sup> (D).

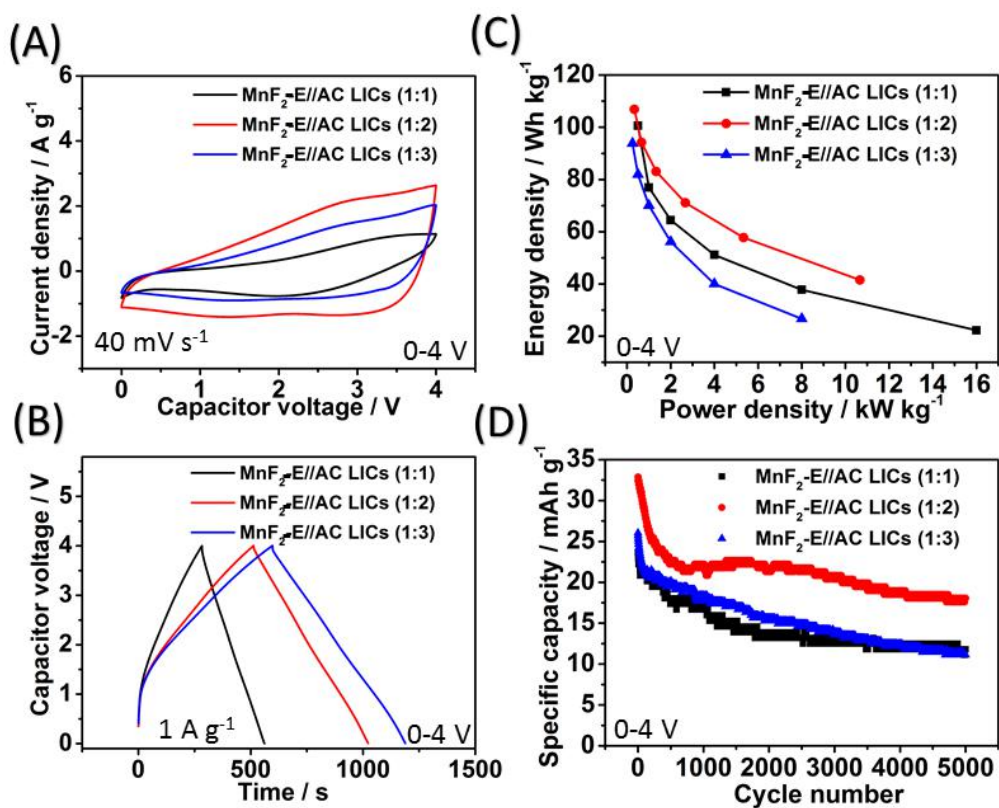

**Figure S25** CV plots at  $40 \text{ mV s}^{-1}$  (A), GCD curves at  $1 \text{ A g}^{-1}$  (B), Ragone plots (C) and cycling behavior for 5000 cycles at  $5 \text{ A g}^{-1}$  (D) of 4 V- $\text{MnF}_2\text{-E//AC LICs}$  (1:1), (1:2) and (1:3).



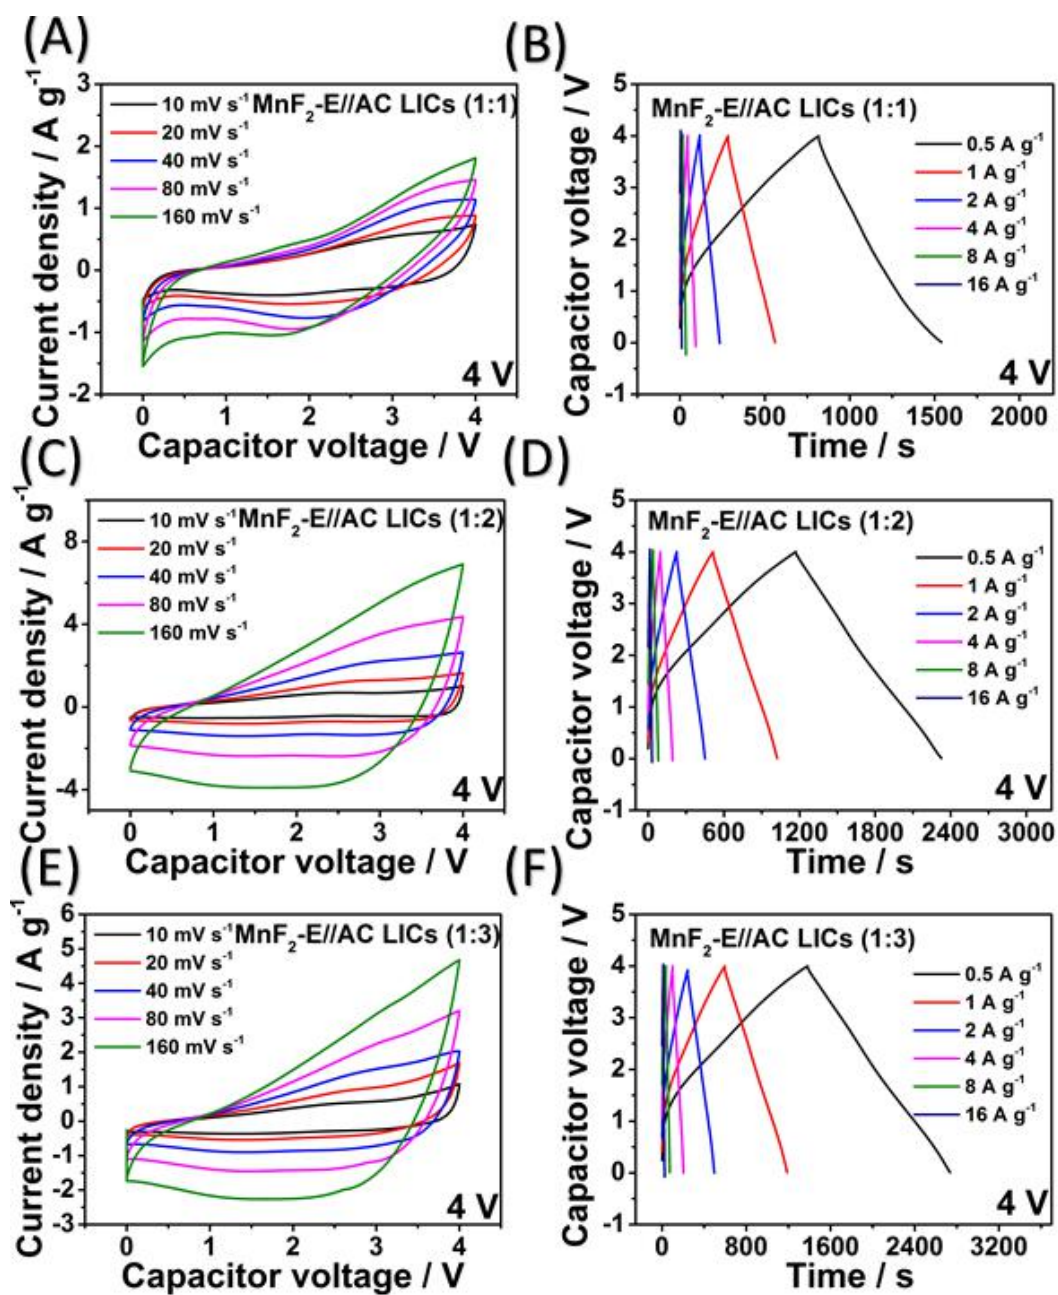

**Figure S26** CV plots of 4 V- $\text{MnF}_2\text{-E//AC}$  LICs (1:1) (A), 4 V- $\text{MnF}_2\text{-E//AC}$  LICs (1:2) (C) and 4 V- $\text{MnF}_2\text{-E//AC}$  LICs (1:3) (E) at 10-160  $\text{mV s}^{-1}$ , GCD curves of 4 V- $\text{MnF}_2\text{-E//AC}$  LICs (1:1) (B), 4 V- $\text{MnF}_2\text{-E//AC}$  LICs (1:2) (D) and 4 V- $\text{MnF}_2\text{-E//AC}$  LICs (1:3) (F) at 0.5-16  $\text{A g}^{-1}$ .



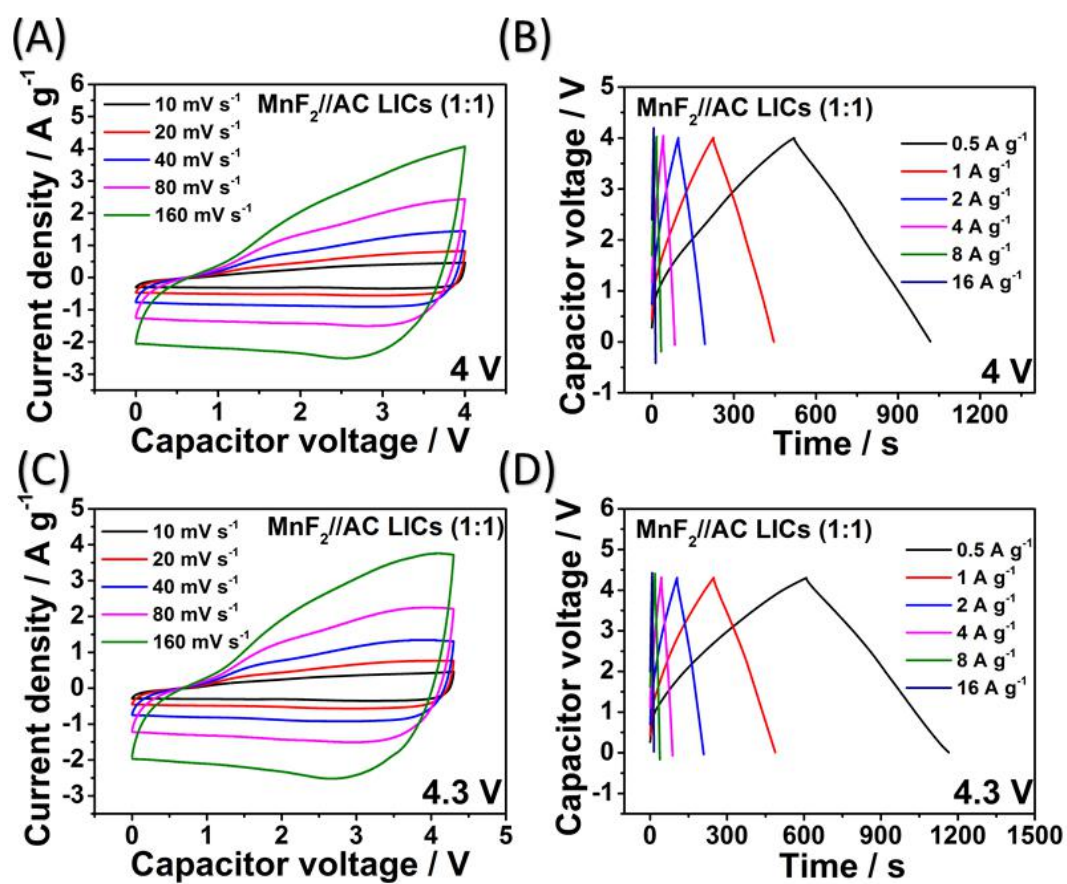

**Figure S27** CV plots of 4 V-MnF<sub>2</sub>//AC LICs (1:1) (A) and 4.3 V-MnF<sub>2</sub>//AC LICs (1:1) (C) at 10-160 mV s<sup>-1</sup>, GCD curves of 4 V-MnF<sub>2</sub>//AC LICs (1:1) (B) and 4.3 V-MnF<sub>2</sub>//AC LICs (1:1) (D) at 0.5-16 A g<sup>-1</sup>.

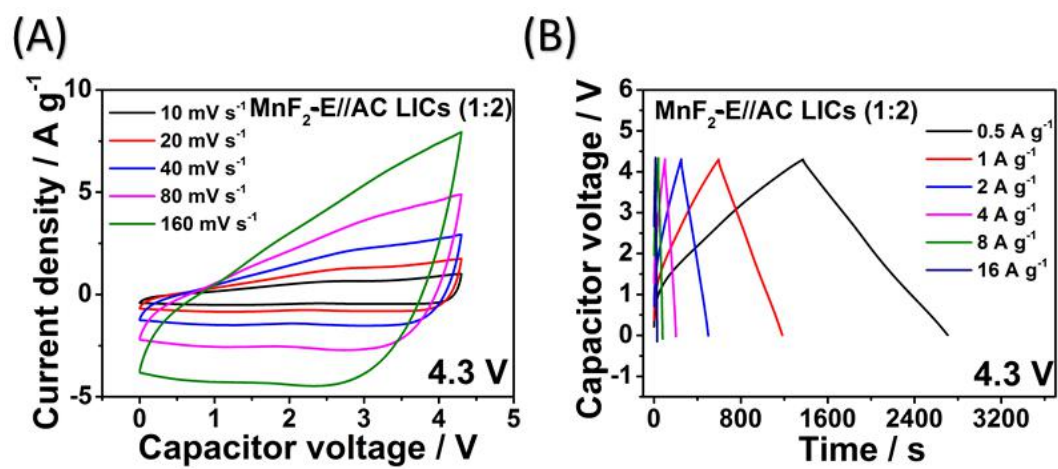

**Figure S28** CV plots of 4.3 V-MnF<sub>2</sub>-E//AC LICs (1:2) (A), GCD curves of 4.3 V-MnF<sub>2</sub>-E//AC LICs (1:2) (B) at 0.5-16 A g<sup>-1</sup>.

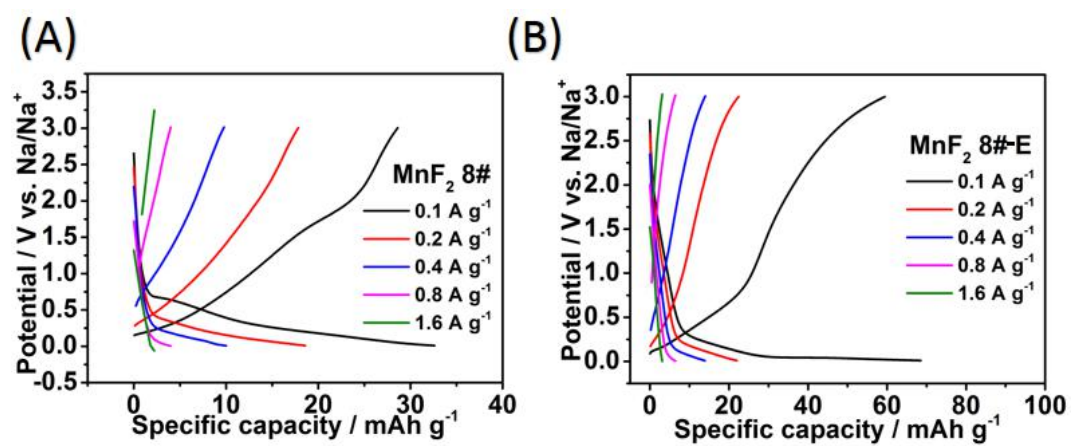

**Figure S29** GCD curves of MnF<sub>2</sub> 8# (A) and MnF<sub>2</sub> 8#-E (B) at 0.1-1.6 A g<sup>-1</sup>.

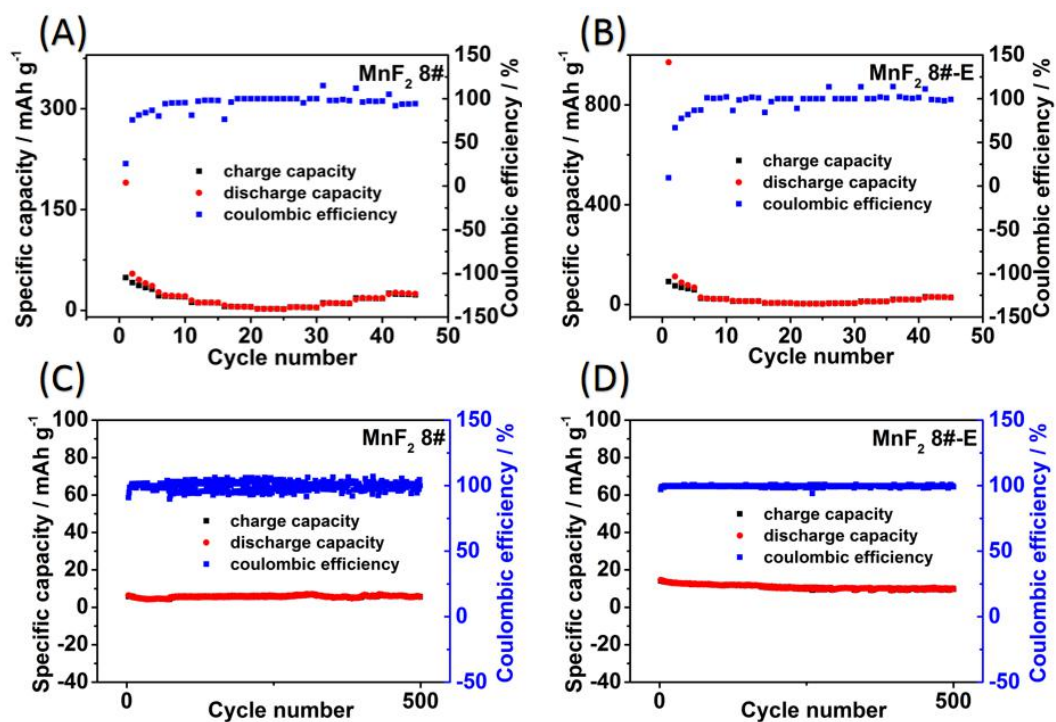

**Figure S30** Rate performance and Coulombic efficiency of MnF<sub>2</sub> 8# (A) and MnF<sub>2</sub> 8#-E (B) electrodes at 0.1-1.6-0.1 A g<sup>-1</sup>, Cycling stability and Coulombic efficiency of MnF<sub>2</sub> 8# (C) and MnF<sub>2</sub> 8#-E (D) electrodes at 0.3 A g<sup>-1</sup> for 500 cycles.

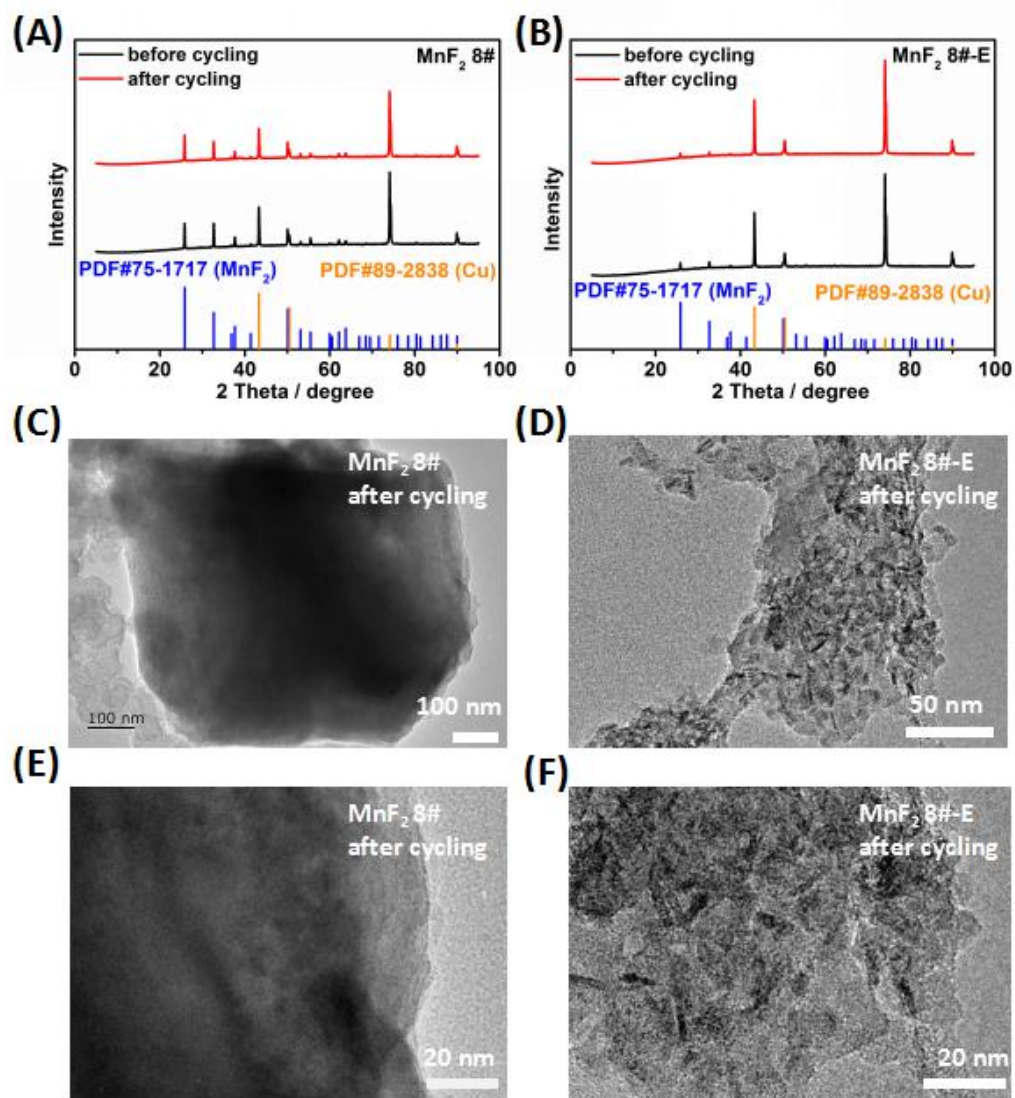

**Figure S31** XRD patterns and TEM images of the MnF<sub>2</sub> 8# (A, C, E) and MnF<sub>2</sub> 8#-E (B, D, F) electrodes after the cycling for Na-ion storage.

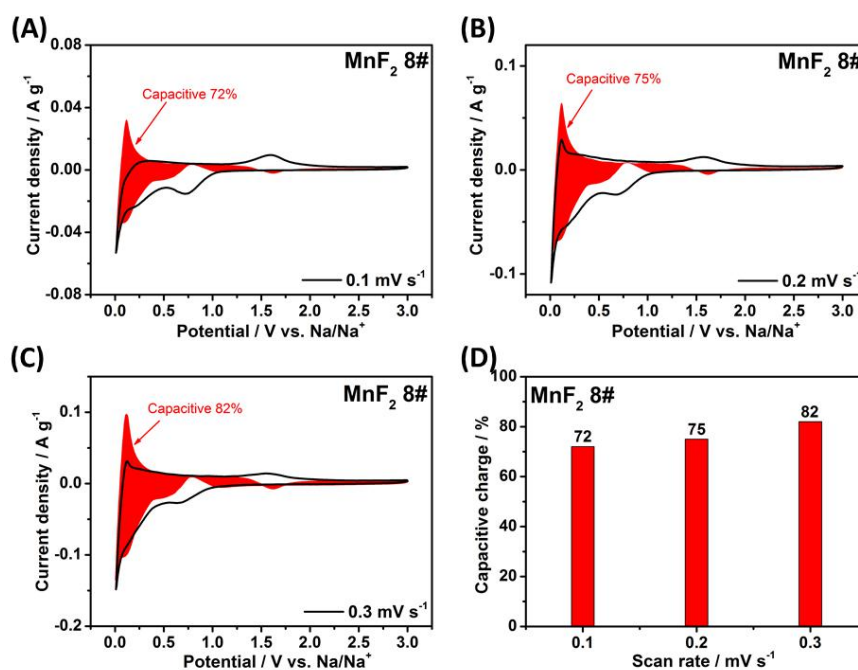

**Figure S32** The pseudocapacitive contributions (the shaded region) of the  $\text{MnF}_2$  8# electrode at 0.1-0.3  $\text{mV s}^{-1}$  (a-c) and the contribution ratios (d) for Na-ion storage.

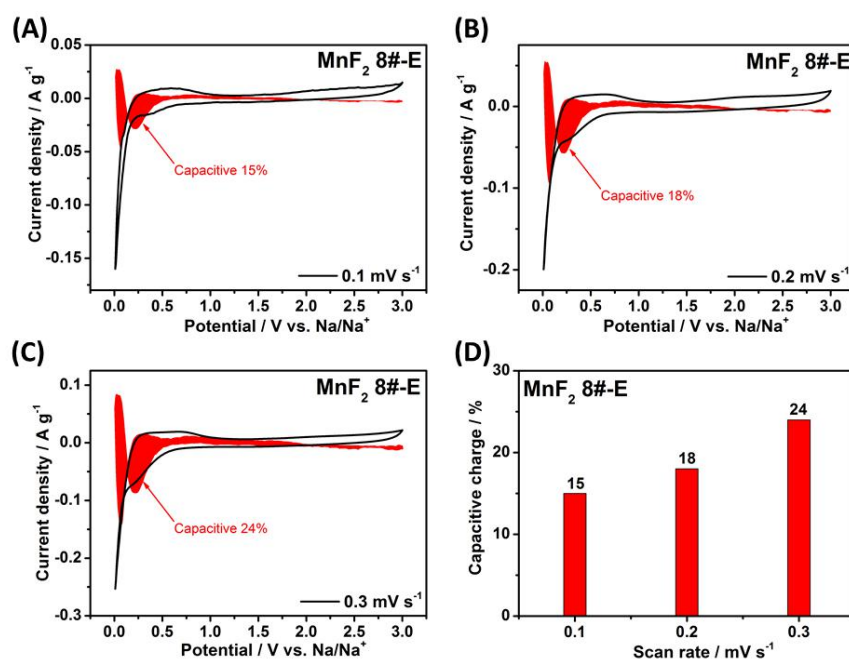

**Figure S33** The pseudocapacitive contributions (the shaded region) of the  $\text{MnF}_2$  8#-E electrode at 0.1-0.3  $\text{mV s}^{-1}$  (a-c) and the contribution ratios (d) for Na-ion storage.

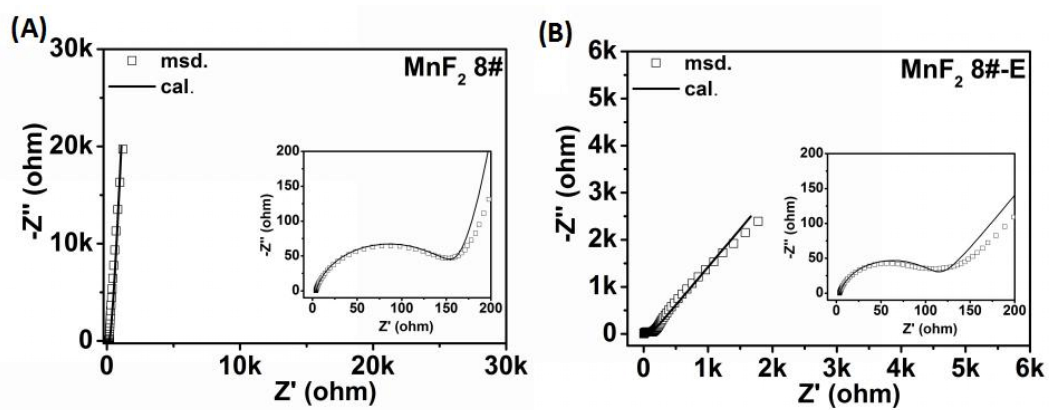

**Figure S34** Nyquist plots of MnF<sub>2</sub> 8# and MnF<sub>2</sub> 8#-E electrodes (the insets are the enlarged high frequency regions).

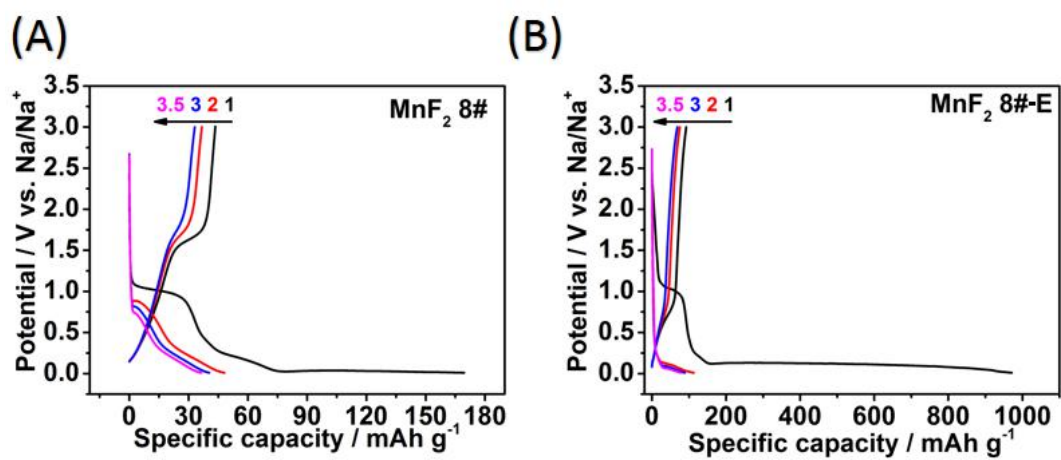

**Figure S35** GCD curves of  $\text{MnF}_2$  8# (A) and  $\text{MnF}_2$  8#-E (B) electrodes at the precharged current density of  $0.1 \text{ A g}^{-1}$



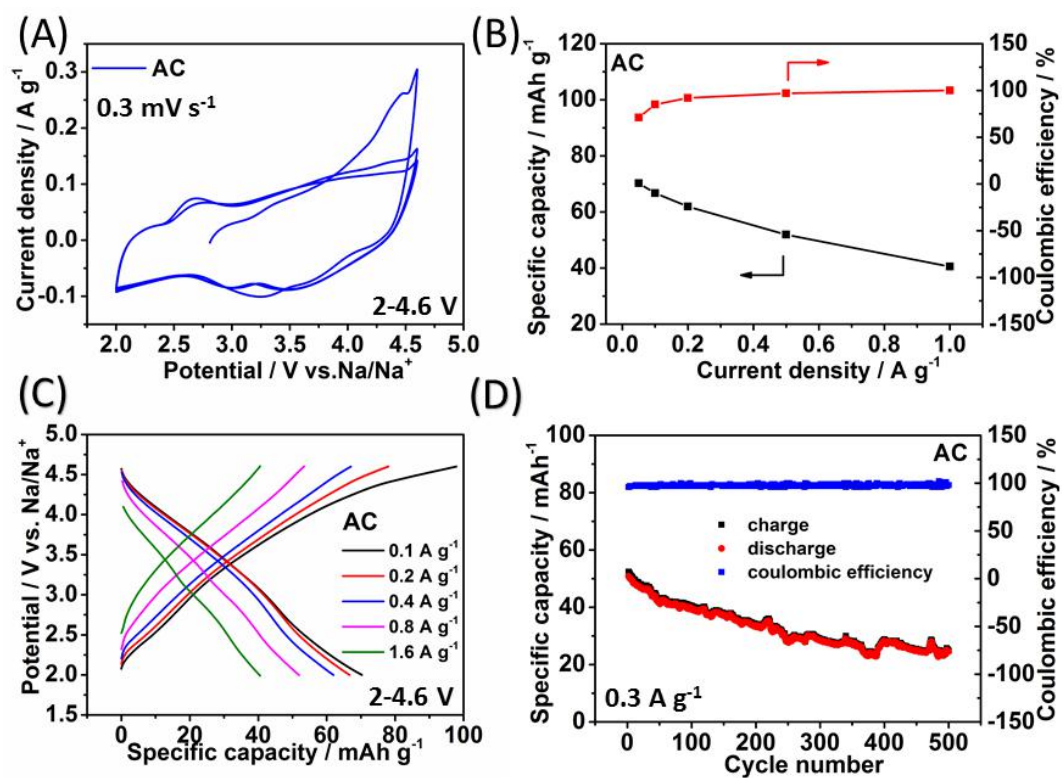

**Figure S36** Performance of AC electrode for Na-ion storage.

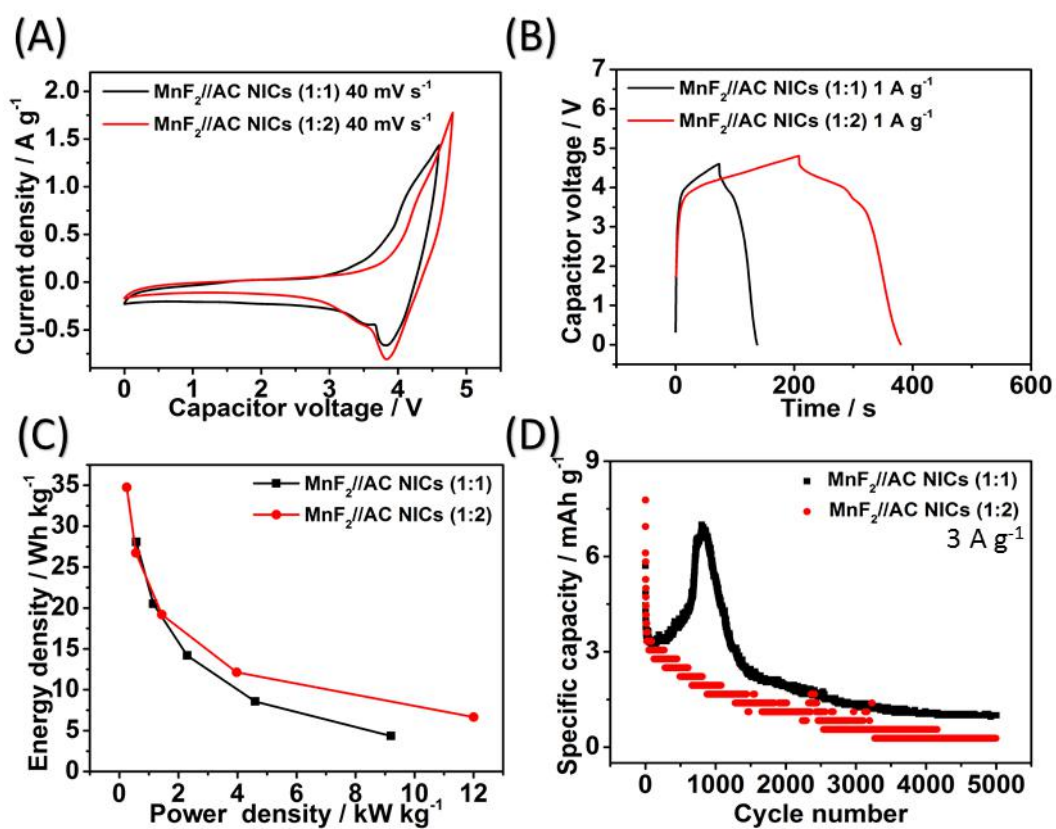

**Figure S37** CV plots at  $40 \text{ mV s}^{-1}$  (A), GCD curves at  $1 \text{ A g}^{-1}$  (B), Ragone plots (C) and cycling behavior for 5000 cycles at  $3 \text{ A g}^{-1}$  (D) of 4.6 V- $\text{MnF}_2/\text{AC}$  NICs (1:1) and 4.8 V- $\text{MnF}_2/\text{AC}$  NICs (1:2).

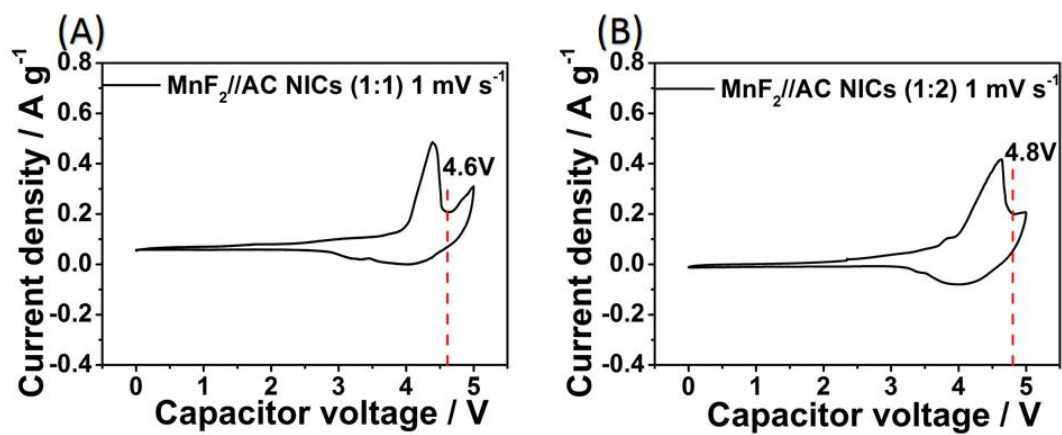

**Figure S38** The third cycle CV curves at 1 mV s<sup>-1</sup> under 0-5 V: MnF<sub>2</sub>//AC NICs (1:1) (A), and MnF<sub>2</sub>//AC NICs (1:2) (B).

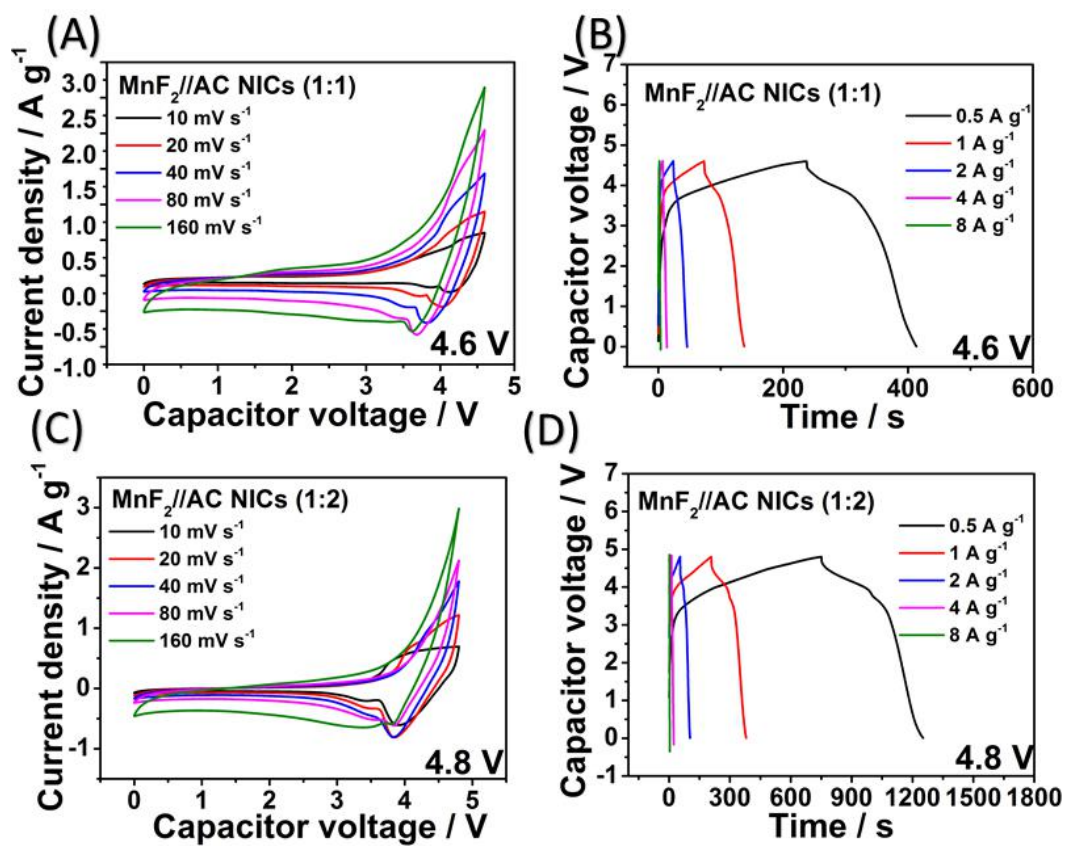

**Figure S39** CV plots of 4.6 V-MnF<sub>2</sub>//AC NICs (1:1) (A) and 4.8 V-MnF<sub>2</sub>//AC NIC (1:2) (C) at 10-160 mV s<sup>-1</sup>, GCD curves of 4.6 V-MnF<sub>2</sub>//AC NIC (1:1) (B) and 4.8 V-MnF<sub>2</sub>//AC NICs (1:2) (D) at 0.5-8 A g<sup>-1</sup>.

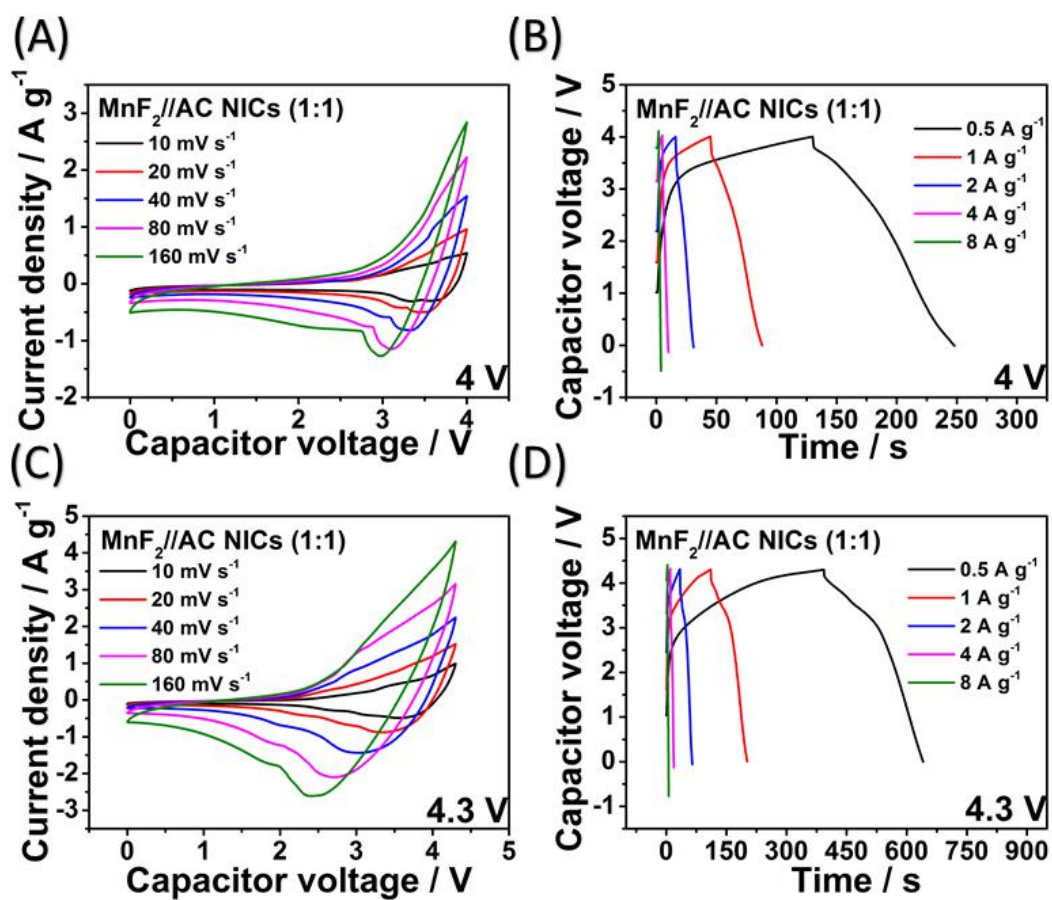

**Figure S40** CV plots of 4 V-MnF<sub>2</sub>//AC NICs (1:1) (A) and 4.3 V-MnF<sub>2</sub>//AC NICs (1:1) (C) at 10-160 mV s<sup>-1</sup>, GCD curves of 4 V-MnF<sub>2</sub>//AC NICs (1:1) (B) and 4.3 V-MnF<sub>2</sub>//AC NICs (1:1) (D) at 0.5-8 A g<sup>-1</sup>.

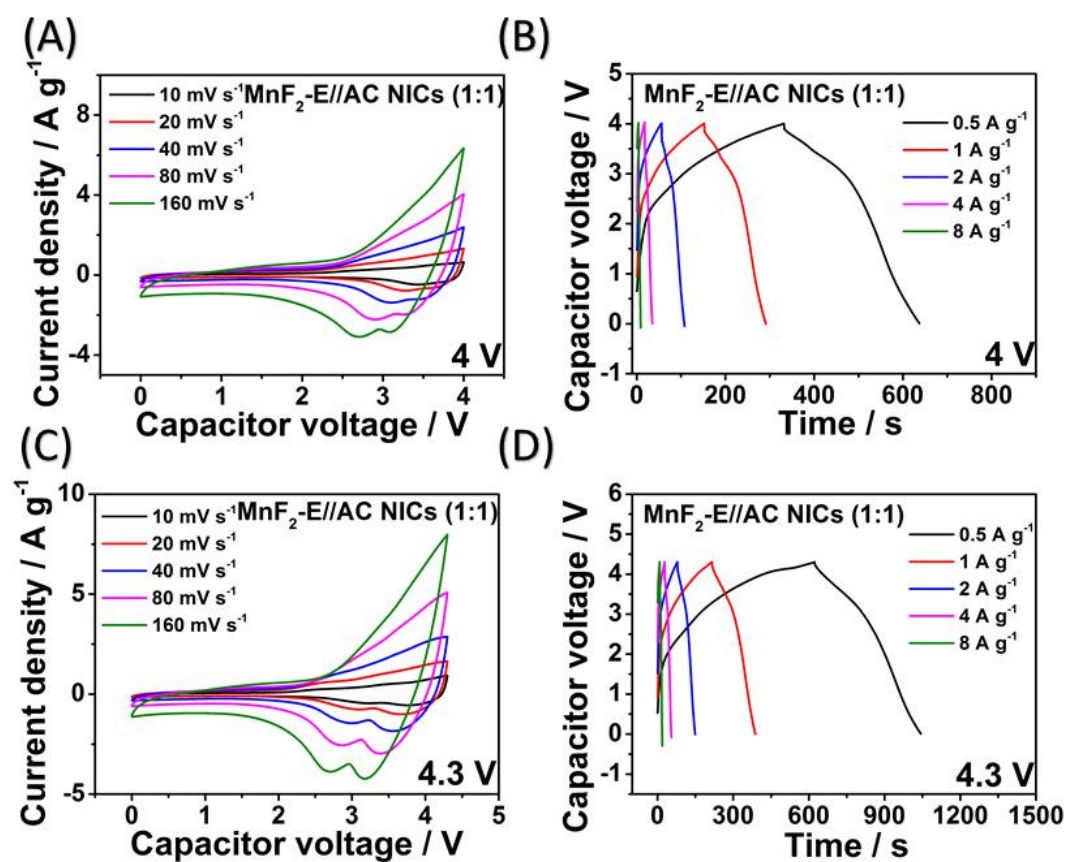

**Figure S41** CV plots of 4 V- $\text{MnF}_2\text{-E//AC NICs (1:1)}$  (A) and 4.3 V- $\text{MnF}_2\text{-E//AC NICs (1:1)}$  (C) at 10-160  $\text{mV s}^{-1}$ , GCD curves of 4 V- $\text{MnF}_2\text{-E//AC NICs (1:1)}$  (B) and 4.3 V- $\text{MnF}_2\text{-E//AC NICs (1:1)}$  (D) at 0.5-8  $\text{A g}^{-1}$ .

| Level | Factors        |                    |            |
|-------|----------------|--------------------|------------|
|       | Solvent (mL)-A | Temperature (°C)-B | Time (h)-C |
| 1     | NPA            | 180                | 6          |
| 2     | NBA            | 190                | 12         |
| 3     | EG             | 200                | 24         |

Note: NPA n-propyl alcohol; NBA n-butyl alcohol; EG ethylene glycol.

**Table S1** Orthogonal experimental design.



| Samples | Mn(CH <sub>3</sub> COO) <sub>2</sub> •4H <sub>2</sub> O<br>(mmol) | Conditions       |                 |                     | Time<br>(h) |
|---------|-------------------------------------------------------------------|------------------|-----------------|---------------------|-------------|
|         |                                                                   | HF (40%)<br>(mL) | Solvent<br>(mL) | Temperature<br>(°C) |             |
| 1#      | 4                                                                 | 7                | NPA 30          | 180                 | 6           |
| 2#      | 4                                                                 | 7                | NPA 30          | 190                 | 12          |
| 3#      | 4                                                                 | 7                | NPA 30          | 200                 | 24          |
| 4#      | 4                                                                 | 7                | NBA 30          | 180                 | 12          |
| 5#      | 4                                                                 | 7                | NBA 30          | 190                 | 24          |
| 6#      | 4                                                                 | 7                | NBA 30          | 200                 | 6           |
| 7#      | 4                                                                 | 7                | EG 30           | 180                 | 24          |
| 8#      | 4                                                                 | 7                | EG 30           | 190                 | 6           |
| 9#      | 4                                                                 | 7                | EG 30           | 200                 | 12          |

**Table S2** Synthesis condition of MnF<sub>2</sub> 1#-9#.

| Samples                       |    | Experimental factors |                    |                  | Specific capacity<br>(mAh g <sup>-1</sup> ) | Rate retention<br>(%) | Cycle retention<br>(%) |
|-------------------------------|----|----------------------|--------------------|------------------|---------------------------------------------|-----------------------|------------------------|
|                               |    | A<br>(solvent)       | B<br>(temperature) | C<br>(time)      |                                             |                       |                        |
| 1#                            |    | 1 (NPA)              | 1 (180℃)           | 1 (6h)           | 154                                         | 42                    | 118                    |
| 2#                            |    | 1 (NPA)              | 2 (190℃)           | 2 (12h)          | 163                                         | 42                    | 153                    |
| 3#                            |    | 1 (NPA)              | 3 (200℃)           | 3 (24h)          | 146                                         | 43                    | 144                    |
| 4#                            |    | 2 (NBA)              | 1 (180℃)           | 2 (12h)          | 151                                         | 49                    | 129                    |
| 5#                            |    | 2 (NBA)              | 2 (190℃)           | 3 (24h)          | 150                                         | 46                    | 142                    |
| 6#                            |    | 2 (NBA)              | 3 (200℃)           | 1 (6h)           | 149                                         | 47                    | 145                    |
| 7#                            |    | 3 (EG)               | 1 (180℃)           | 3 (24h)          | 143                                         | 51                    | 147                    |
| 8#                            |    | 3 (EG)               | 2 (190℃)           | 1 (6h)           | 162                                         | 54                    | 141                    |
| 9#                            |    | 3 (EG)               | 3 (200℃)           | 2 (12h)          | 144                                         | 51                    | 145                    |
| Specific capacity<br>(mAh/ g) | K1 | 463.00               | 448.00             | 465.00           | MnF <sub>2</sub>                            |                       |                        |
|                               | K2 | 450.00               | 475.00             | 458.00           |                                             |                       |                        |
|                               | K3 | 449.00               | 439.00             | 439.00           |                                             |                       |                        |
|                               | k1 | 154.33               | 149.33             | 155.00           |                                             |                       |                        |
|                               | k2 | 150.00               | 158.33             | 152.67           |                                             |                       |                        |
|                               | k3 | 149.67               | 146.33             | 146.33           |                                             |                       |                        |
|                               | R  | 4.67                 | 12.00              | 8.67             |                                             |                       |                        |
| Rate retention<br>(%)         | K1 | 127.00               | 142.00             | 143.00           |                                             |                       |                        |
|                               | K2 | 142.00               | 142.00             | 142.00           |                                             |                       |                        |
|                               | K3 | 156.00               | 141.00             | 140.00           |                                             |                       |                        |
|                               | k1 | 42.33                | 47.33              | 47.67            |                                             |                       |                        |
|                               | k2 | 47.33                | 47.33              | 47.33            |                                             |                       |                        |
|                               | k3 | 52.00                | 47.00              | 46.67            |                                             |                       |                        |
|                               | R  | 9.67                 | 0.33               | 1.00             |                                             |                       |                        |
| Cycle retention<br>(%)        | K1 | 415.00               | 394.00             | 404.00           |                                             |                       |                        |
|                               | K2 | 416.00               | 436.00             | 427.00           |                                             |                       |                        |
|                               | K3 | 433.00               | 434.00             | 433.00           |                                             |                       |                        |
|                               | k1 | 138.33               | 131.33             | 134.67           |                                             |                       |                        |
|                               | k2 | 138.67               | 145.33             | 142.33           |                                             |                       |                        |
|                               | k3 | 144.33               | 144.67             | 144.33           |                                             |                       |                        |
|                               | R  | 6.00                 | 13.33              | 9.67             |                                             |                       |                        |
| Specific capacity             |    |                      |                    | B>C>A            | A1B2C1                                      |                       |                        |
| Rate retention                |    |                      |                    | A>C>B            | A3(B1 or B2 ) C1                            |                       |                        |
| Cycle retention               |    |                      |                    | B>C>A            | A3B3C3                                      |                       |                        |
| The optimal conditions        |    |                      |                    | A3B2C3 or A3B2C1 |                                             |                       |                        |
| Selected optimal conditions   |    |                      |                    | A3B2C1           |                                             |                       |                        |

**Table S3** Orthogonal experimental analysis results of MnF<sub>2</sub>

| Devices                   | Samples                     | Specific capacity / mAh g <sup>-1</sup> |                          |                          |                          |                          |                          | Specific capacity after 500 cycles / mAh g <sup>-1</sup> | Cycle retention / % |
|---------------------------|-----------------------------|-----------------------------------------|--------------------------|--------------------------|--------------------------|--------------------------|--------------------------|----------------------------------------------------------|---------------------|
|                           |                             | 0.1 (A g <sup>-1</sup> )                | 0.2 (A g <sup>-1</sup> ) | 0.4 (A g <sup>-1</sup> ) | 0.8 (A g <sup>-1</sup> ) | 1.6 (A g <sup>-1</sup> ) | 3.2 (A g <sup>-1</sup> ) |                                                          |                     |
| Li//MnF <sub>2</sub> LIBs | MnF <sub>2</sub> 1#         | 145                                     | 128                      | 112                      | 94                       | 81                       | 65                       | 161                                                      | 168                 |
|                           | MnF <sub>2</sub> 2#         | 149                                     | 137                      | 125                      | 109                      | 89                       | 67                       | 123                                                      | 160                 |
|                           | MnF <sub>2</sub> 3#         | 137                                     | 130                      | 119                      | 104                      | 84                       | 68                       | 113                                                      | 153                 |
|                           | MnF <sub>2</sub> 4#         | 145                                     | 136                      | 125                      | 111                      | 94                       | 74                       | 109                                                      | 138                 |
|                           | MnF <sub>2</sub> 5#         | 143                                     | 132                      | 120                      | 105                      | 87                       | 70                       | 107                                                      | 153                 |
|                           | MnF <sub>2</sub> 6#         | 143                                     | 133                      | 125                      | 112                      | 97                       | 80                       | 128                                                      | 154                 |
|                           | MnF <sub>2</sub> 7#         | 135                                     | 125                      | 118                      | 106                      | 90                       | 74                       | 121                                                      | 151                 |
|                           | <b>MnF<sub>2</sub> 8#</b>   | <b>153</b>                              | <b>146</b>               | <b>137</b>               | <b>124</b>               | <b>108</b>               | <b>89</b>                | <b>138</b>                                               | <b>152</b>          |
|                           | MnF <sub>2</sub> 9#         | 136                                     | 127                      | 118                      | 106                      | 89                       | 74                       | 120                                                      | 154                 |
|                           | <b>MnF<sub>2</sub> 8#-E</b> | <b>411</b>                              | <b>346</b>               | <b>285</b>               | <b>235</b>               | <b>179</b>               | <b>120</b>               | <b>271</b>                                               | <b>207</b>          |
| Na//MnF <sub>2</sub> NIBs | MnF <sub>2</sub> 8#         | 31                                      | 19                       | 10                       | 4                        | 2                        | -                        | 5.4                                                      | 90                  |
|                           | MnF <sub>2</sub> 8#-E       | 59                                      | 22                       | 14                       | 6                        | 4                        | -                        | 11                                                       | 77                  |

**Table S4** Summary of performance of MnF<sub>2</sub> 1#-9# and MnF<sub>2</sub> 8#-E electrodes.

| Anode materials for LIBs              | Specific capacity                                         | Rate behavior                                             | Cycle life                                                                         | Refs.                                                      |
|---------------------------------------|-----------------------------------------------------------|-----------------------------------------------------------|------------------------------------------------------------------------------------|------------------------------------------------------------|
| MnF <sub>2</sub>                      | 300 mA h g <sup>-1</sup><br>/ 0.1 C                       | 180 mA h g <sup>-1</sup><br>/ 10 C                        | 237 mA h g <sup>-1</sup><br>/ 5000 / 10 C                                          | <i>Adv. Energy Mater.</i> ,<br>2015, 5, 1401716            |
| CoF <sub>2</sub>                      | 350 mA h g <sup>-1</sup><br>/ 0.0553 A g <sup>-1</sup>    | #                                                         | 13.5%<br>/ 100 / 1.1 A g <sup>-1</sup>                                             | <i>Electrochim. Acta</i> ,<br>2015, 168, 225-233           |
| Mn <sub>3</sub> O <sub>4</sub>        | 180 mA h g <sup>-1</sup><br>/ 0.04 A g <sup>-1</sup>      | #                                                         | 15.9%<br>/ 50 / 0.04 A g <sup>-1</sup>                                             | <i>ACS Appl. Mater. Interfaces</i> ,<br>2012, 4, 1636–1642 |
| NbO <sub>2</sub> F                    | 250 mA h g <sup>-1</sup><br>/ 0.03 A g <sup>-1</sup>      | #                                                         | 72% /<br>40/0.03A g <sup>-1</sup>                                                  | <i>J. Power Sources</i> ,<br>2006, 162, 1312–1321          |
| <b>Mn-O-F<br/>(MnF<sub>2</sub>-E)</b> | <b>411 mA h g<sup>-1</sup><br/>/ 0.1 A g<sup>-1</sup></b> | <b>120 mA h g<sup>-1</sup><br/>/ 3.2 A g<sup>-1</sup></b> | <b>271 mA h g<sup>-1</sup><br/>(207% retention)<br/>/ 500 / 2 A g<sup>-1</sup></b> | <b>This work</b>                                           |

**Table S5** A comparasion for Mn-O-F (MnF<sub>2</sub> 8#-E) anode with literature for LIBs.

| Systems<br>(LIBs)           | Model<br>$R(QR)W(QR)$ |                              |        |                          |                                |                              |        |                       |                       |
|-----------------------------|-----------------------|------------------------------|--------|--------------------------|--------------------------------|------------------------------|--------|-----------------------|-----------------------|
|                             | $R_s$<br>( $\Omega$ ) | $Q_1$<br>( $S \cdot sec^n$ ) | $n_1$  | $R_{ct}$<br>( $\Omega$ ) | $W$<br>( $S \cdot sec^{0.5}$ ) | $Q_2$<br>( $S \cdot sec^n$ ) | $n_2$  | $R_e$<br>( $\Omega$ ) | $\chi^2$              |
| MnF <sub>2</sub> 1#         | 3.419                 | 4.772×10 <sup>-4</sup>       | 0.9674 | <b>56.95</b>             | 0.03817                        | 1.893×10 <sup>-5</sup>       | 0.8383 | 3.508×10 <sup>5</sup> | 2.73×10 <sup>-3</sup> |
| MnF <sub>2</sub> 2#         | 3.713                 | 4.931×10 <sup>-4</sup>       | 0.9614 | <b>59.62</b>             | 0.2168                         | 1.584×10 <sup>-5</sup>       | 0.8519 | 1.144×10 <sup>6</sup> | 2.1×10 <sup>-3</sup>  |
| MnF <sub>2</sub> 3#         | 3.372                 | 1.508×10 <sup>-5</sup>       | 0.8458 | <b>59.79</b>             | 0.02511                        | 6.573×10 <sup>-4</sup>       | 0.9681 | 3.17×10 <sup>6</sup>  | 3.07×10 <sup>-3</sup> |
| MnF <sub>2</sub> 4#         | 3.549                 | 1.423×10 <sup>-5</sup>       | 0.8667 | <b>62.33</b>             | 0.02601                        | 7.544×10 <sup>-4</sup>       | 0.9733 | 5.186×10 <sup>5</sup> | 2.95×10 <sup>-3</sup> |
| MnF <sub>2</sub> 5#         | 3.917                 | 8.254×10 <sup>-4</sup>       | 0.9672 | <b>68.34</b>             | 0.02364                        | 1.57×10 <sup>-5</sup>        | 0.8555 | 4.375×10 <sup>5</sup> | 2.53×10 <sup>-3</sup> |
| MnF <sub>2</sub> 6#         | 3.935                 | 1.614×10 <sup>-5</sup>       | 0.8575 | <b>63.11</b>             | 0.02576                        | 7.698×10 <sup>-4</sup>       | 0.9708 | 5.645×10 <sup>5</sup> | 2.43×10 <sup>-3</sup> |
| MnF <sub>2</sub> 7#         | 3.34                  | 1.395×10 <sup>-5</sup>       | 0.8741 | <b>44.46</b>             | 0.05389                        | 8.176×10 <sup>-4</sup>       | 0.9665 | 4.665×10 <sup>5</sup> | 2.98×10 <sup>-3</sup> |
| <b>MnF<sub>2</sub> 8#</b>   | 3.171                 | 1.435×10 <sup>-5</sup>       | 0.8711 | <b>46.13</b>             | 0.01497                        | 6.862×10 <sup>-4</sup>       | 0.9751 | 4.267×10 <sup>5</sup> | 2.8×10 <sup>-3</sup>  |
| MnF <sub>2</sub> 9#         | 3.126                 | 5.98×10 <sup>-4</sup>        | 0.9724 | <b>43.09</b>             | 0.02385                        | 1.835×10 <sup>-5</sup>       | 0.8639 | 3.111×10 <sup>5</sup> | 3.41×10 <sup>-3</sup> |
| <b>MnF<sub>2</sub> 8#-E</b> | 3.411                 | 2.26×10 <sup>-5</sup>        | 0.8418 | <b>37.33</b>             | 0.0168                         | 3.506×10 <sup>-3</sup>       | 0.8056 | 6427                  | 3.61×10 <sup>-3</sup> |

**Table S6** EIS parameters of MnF<sub>2</sub> and MnF<sub>2</sub> 8#-E electrodes for Li-ion storage.

| Systems                       | Voltage window                | Energy density (Wh kg <sup>-1</sup> ) |                       |                      | Power density (kW kg <sup>-1</sup> ) |                       |                      | Cycling behavior                |                                 |
|-------------------------------|-------------------------------|---------------------------------------|-----------------------|----------------------|--------------------------------------|-----------------------|----------------------|---------------------------------|---------------------------------|
| LICs                          | MnF <sub>2</sub> //AC (1:1)   | 0-4.0 V                               | 0.5 A g <sup>-1</sup> | 4 A g <sup>-1</sup>  | 16 A g <sup>-1</sup>                 | 0.5 A g <sup>-1</sup> | 4 A g <sup>-1</sup>  | 16 A g <sup>-1</sup>            | 5 A g <sup>-1</sup> /1000/79.4% |
|                               |                               |                                       | 69.2                  | 46.7                 | 31.1                                 | 0.5                   | 4.0                  | 16.0                            | 5 A g <sup>-1</sup> /2000/79.4% |
|                               |                               |                                       |                       |                      |                                      |                       |                      |                                 | 5 A g <sup>-1</sup> /3000/72.5% |
|                               |                               |                                       |                       |                      |                                      |                       |                      |                                 | 5 A g <sup>-1</sup> /5000/72.5% |
|                               | MnF <sub>2</sub> -E//AC (1:2) | 0-4.3 V                               | 0.5 A g <sup>-1</sup> | 4 A g <sup>-1</sup>  | 16 A g <sup>-1</sup>                 | 0.5 A g <sup>-1</sup> | 4 A g <sup>-1</sup>  | 16 A g <sup>-1</sup>            | 5 A g <sup>-1</sup> /1000/63.5% |
|                               |                               |                                       | 82.9                  | 52.5                 | 38.2                                 | 0.54                  | 4.3                  | 17.2                            | 5 A g <sup>-1</sup> /2000/53.3% |
|                               |                               |                                       |                       |                      |                                      |                       |                      |                                 | 5 A g <sup>-1</sup> /3000/46.6% |
|                               |                               |                                       |                       |                      |                                      |                       |                      |                                 | 5 A g <sup>-1</sup> /5000/40.4% |
|                               | MnF <sub>2</sub> -E//AC (1:2) | 0-4.0 V                               | 0.5 A g <sup>-1</sup> | 4 A g <sup>-1</sup>  | 16 A g <sup>-1</sup>                 | 0.5 A g <sup>-1</sup> | 4 A g <sup>-1</sup>  | 16 A g <sup>-1</sup>            | 5 A g <sup>-1</sup> /1000/66.5% |
|                               |                               |                                       | 106.8                 | 71.1                 | 41.4                                 | 0.33                  | 2.7                  | 10.7                            | 5 A g <sup>-1</sup> /2000/66.5% |
|                               |                               |                                       |                       |                      |                                      |                       |                      |                                 | 5 A g <sup>-1</sup> /3000/63.4% |
|                               |                               |                                       |                       |                      |                                      |                       |                      |                                 | 5 A g <sup>-1</sup> /5000/56.1% |
| MnF <sub>2</sub> -E//AC (1:2) | 0-4.3 V                       | 0.5 A g <sup>-1</sup>                 | 4 A g <sup>-1</sup>   | 16 A g <sup>-1</sup> | 0.5 A g <sup>-1</sup>                | 4 A g <sup>-1</sup>   | 16 A g <sup>-1</sup> | 5 A g <sup>-1</sup> /1000/63.5% |                                 |
|                               |                               | 132.2                                 | 79.6                  | 44.6                 | 0.36                                 | 2.9                   | 11.5                 | 5 A g <sup>-1</sup> /2000/60.8% |                                 |
|                               |                               |                                       |                       |                      |                                      |                       |                      | 5 A g <sup>-1</sup> /3000/55.1% |                                 |
|                               |                               |                                       |                       |                      |                                      |                       |                      | 5 A g <sup>-1</sup> /5000/47.9% |                                 |
| NICs                          | MnF <sub>2</sub> //AC (1:1)   | 0-4.0 V                               | 0.5 A g <sup>-1</sup> | 2 A g <sup>-1</sup>  | 8 A g <sup>-1</sup>                  | 0.5 A g <sup>-1</sup> | 2 A g <sup>-1</sup>  | 8 A g <sup>-1</sup>             | 3 A g <sup>-1</sup> /100/62.5%  |
|                               |                               |                                       | 16.4                  | 8.3                  | 4.4                                  | 0.5                   | 2.0                  | 8.0                             | 3 A g <sup>-1</sup> /200/50.2%  |
|                               |                               |                                       |                       |                      |                                      |                       |                      |                                 | 3 A g <sup>-1</sup> /300/50.2%  |
|                               |                               |                                       |                       |                      |                                      |                       |                      |                                 | 3 A g <sup>-1</sup> /400/50.2%  |
|                               | MnF <sub>2</sub> -E//AC (1:1) | 0-4.3 V                               | 0.5 A g <sup>-1</sup> | 2 A g <sup>-1</sup>  | 8 A g <sup>-1</sup>                  | 0.5 A g <sup>-1</sup> | 2 A g <sup>-1</sup>  | 8 A g <sup>-1</sup>             | 3 A g <sup>-1</sup> /500/49.8%  |
|                               |                               |                                       | 37                    | 18.5                 | 7.2                                  | 0.54                  | 2.1                  | 8.6                             | 3 A g <sup>-1</sup> /800/49.8%  |
|                               |                               |                                       |                       |                      |                                      |                       |                      |                                 | 3 A g <sup>-1</sup> /100/66.7%  |
|                               |                               |                                       |                       |                      |                                      |                       |                      |                                 | 3 A g <sup>-1</sup> /200/66.7%  |
|                               | MnF <sub>2</sub> -E//AC (1:1) | 0-4.0 V                               | 0.5 A g <sup>-1</sup> | 2 A g <sup>-1</sup>  | 8 A g <sup>-1</sup>                  | 0.5 A g <sup>-1</sup> | 2 A g <sup>-1</sup>  | 8 A g <sup>-1</sup>             | 3 A g <sup>-1</sup> /300/66.7%  |
|                               |                               |                                       | 42.1                  | 28.4                 | 8.9                                  | 0.5                   | 2.0                  | 8.0                             | 3 A g <sup>-1</sup> /400/58.4%  |
|                               |                               |                                       |                       |                      |                                      |                       |                      |                                 | 3 A g <sup>-1</sup> /500/58.4%  |
|                               |                               |                                       |                       |                      |                                      |                       |                      |                                 | 3 A g <sup>-1</sup> /800/58.4%  |
| MnF <sub>2</sub> -E//AC (1:1) | 0-4.3 V                       | 0.5 A g <sup>-1</sup>                 | 2 A g <sup>-1</sup>   | 8 A g <sup>-1</sup>  | 0.5 A g <sup>-1</sup>                | 2 A g <sup>-1</sup>   | 8 A g <sup>-1</sup>  | 3 A g <sup>-1</sup> /100/68.4%  |                                 |
|                               |                               | 55.9                                  | 36.8                  | 19.2                 | 0.48                                 | 1.9                   | 7.7                  | 3 A g <sup>-1</sup> /200/63.1%  |                                 |
|                               |                               |                                       |                       |                      |                                      |                       |                      | 3 A g <sup>-1</sup> /300/52.7%  |                                 |
|                               |                               |                                       |                       |                      |                                      |                       |                      | 3 A g <sup>-1</sup> /400/52.7%  |                                 |
| MnF <sub>2</sub> -E//AC (1:1) | 0-4.0 V                       | 0.5 A g <sup>-1</sup>                 | 2 A g <sup>-1</sup>   | 8 A g <sup>-1</sup>  | 0.5 A g <sup>-1</sup>                | 2 A g <sup>-1</sup>   | 8 A g <sup>-1</sup>  | 3 A g <sup>-1</sup> /500/52.7%  |                                 |
|                               |                               | 55.9                                  | 36.8                  | 19.2                 | 0.48                                 | 1.9                   | 7.7                  | 3 A g <sup>-1</sup> /800/52.7%  |                                 |
|                               |                               |                                       |                       |                      |                                      |                       |                      | 3 A g <sup>-1</sup> /100/51.7%  |                                 |
|                               |                               |                                       |                       |                      |                                      |                       |                      | 3 A g <sup>-1</sup> /200/45.3%  |                                 |
| MnF <sub>2</sub> -E//AC (1:1) | 0-4.3 V                       | 0.5 A g <sup>-1</sup>                 | 2 A g <sup>-1</sup>   | 8 A g <sup>-1</sup>  | 0.5 A g <sup>-1</sup>                | 2 A g <sup>-1</sup>   | 8 A g <sup>-1</sup>  | 3 A g <sup>-1</sup> /300/41.9%  |                                 |
|                               |                               | 55.9                                  | 36.8                  | 19.2                 | 0.48                                 | 1.9                   | 7.7                  | 3 A g <sup>-1</sup> /400/35.4%  |                                 |
|                               |                               |                                       |                       |                      |                                      |                       |                      | 3 A g <sup>-1</sup> /500/35.4%  |                                 |
|                               |                               |                                       |                       |                      |                                      |                       |                      | 3 A g <sup>-1</sup> /800/32.2%  |                                 |

**Table S7** Summary of performance of MnF<sub>2</sub>//AC and MnF<sub>2</sub>-E//AC LICs and NICs.

| Systems                                   | Voltage window / V | Energy density / Wh kg <sup>-1</sup> | Power density / kW kg <sup>-1</sup> | Cycling behavior / retention%, repeated cycles, current density | Refs.            |
|-------------------------------------------|--------------------|--------------------------------------|-------------------------------------|-----------------------------------------------------------------|------------------|
| TiSe <sub>0.6</sub> S <sub>1.4</sub> //AC | 0-2.6              | 50-14                                | -                                   | 69%/5000/ 1 A g <sup>-1</sup>                                   | 1                |
| TiO <sub>2</sub> -rGO//AC                 | 1.0-4.5            | 42-8.9                               | 0.8-8.0                             | 80%/100/ 0.4 Ag <sup>-1</sup>                                   | 2                |
| CNT/V <sub>2</sub> O <sub>5</sub> //AC    | 1.8-4.0            | 25.5-6.9                             | 0.04-6.3                            | -                                                               | 3                |
| TiO <sub>2</sub> -B//CNT                  | 0.0-2.8            | 23-7                                 | 0.14-2.8                            | 73%/1200/ 1.5 A g <sup>-1</sup>                                 | 4                |
| TiO <sub>2</sub> belt///graphene          | 0.0-3.8            | 82-21                                | 0.57-19                             | 73%/600/ 1 A g <sup>-1</sup>                                    | 5                |
| TiO <sub>2</sub> @EEG//EEG                | 0.0-3.0            | 72-10                                | 0.303-2.0                           | 68%/1000/ 1.5 A g <sup>-1</sup>                                 | 6                |
| <b>MnF<sub>2</sub> 8#//AC (1:1)</b>       | <b>0-4.0</b>       | <b>69.2-31.1</b>                     | <b>0.5-16.0</b>                     | <b>72.5%/5000/ 5 A g<sup>-1</sup></b>                           | <b>This work</b> |
|                                           | <b>0-4.3</b>       | <b>82.9-38.2</b>                     | <b>0.54-17.2</b>                    | <b>63.5%/1000/ 5 A g<sup>-1</sup></b>                           |                  |
| <b>MnF<sub>2</sub> 8#-E//AC (1:2)</b>     | <b>0-4.0</b>       | <b>106.8-41.4</b>                    | <b>0.33-10.7</b>                    | <b>63.4%/3000/ 5 A g<sup>-1</sup></b>                           |                  |
|                                           | <b>0-4.3</b>       | <b>132.2-44.6</b>                    | <b>0.36-11.5</b>                    | <b>60.8%/2000/ 5 A g<sup>-1</sup></b>                           |                  |

Note: EEG = graphene nanosheets; CNT = carbon nanotube; rGO = Reduced Graphene Oxide

**Table S8** Electrochemical performance comparison for some reported LICs.



| Systems<br>(NIBs)           | Model<br>$R(QR)W(QR)$ |                           |        |                          |                                |                           |        |                        |                       |
|-----------------------------|-----------------------|---------------------------|--------|--------------------------|--------------------------------|---------------------------|--------|------------------------|-----------------------|
|                             | $R_s$ ( $\Omega$ )    | $Q_1$ ( $S \cdot sec^n$ ) | $n_1$  | $R_{ct}$<br>( $\Omega$ ) | $W$<br>( $S \cdot sec^{0.5}$ ) | $Q_2$ ( $S \cdot sec^n$ ) | $n_2$  | $R_e$<br>( $\Omega$ )  | $\chi^2$              |
| <b>MnF<sub>2</sub> 8#</b>   | 3.68                  | $6.526 \times 10^{-4}$    | 0.9872 | <b>144.8</b>             | 0.004796                       | $1.366 \times 10^{-5}$    | 0.8916 | $2.154 \times 10^{14}$ | $3.26 \times 10^{-3}$ |
| <b>MnF<sub>2</sub> 8#-E</b> | 3.632                 | $1.468 \times 10^{-5}$    | 0.8627 | <b>106.7</b>             | $8.269 \times 10^7$            | $1.775 \times 10^{-3}$    | 0.6392 | $4.173 \times 10^{11}$ | $4.23 \times 10^{-3}$ |

**Table S9** EIS parameters of MnF<sub>2</sub> 8# and MnF<sub>2</sub> 8#-E electrodes for Na-ion storage.

| Systems                                | Voltage window / V | Energy density / Wh kg <sup>-1</sup> | Power density / kW kg <sup>-1</sup> | Cycling behavior / retention%, repeated cycles, current density                                                                                                                                                                                                                                                                      | Refs.            |
|----------------------------------------|--------------------|--------------------------------------|-------------------------------------|--------------------------------------------------------------------------------------------------------------------------------------------------------------------------------------------------------------------------------------------------------------------------------------------------------------------------------------|------------------|
| NiCo <sub>2</sub> O <sub>4</sub> //AC  | 0-3.0              | 23.5-13.8                            | 0.036-0.308                         | 61.2%/2000/ 0.15 A g <sup>-1</sup>                                                                                                                                                                                                                                                                                                   | 7                |
| Na <sub>0.44</sub> MnO <sub>2</sub> // | 0-1.6              | 27.9-15                              | 0.012-0.24                          | -                                                                                                                                                                                                                                                                                                                                    | 8                |
| Na <sub>0.44</sub> MnO <sub>2</sub>    |                    |                                      |                                     |                                                                                                                                                                                                                                                                                                                                      |                  |
| V <sub>2</sub> O <sub>5</sub> /CNT//AC | 0-2.8              | 38-7.5                               | 0.14-5.0                            | -                                                                                                                                                                                                                                                                                                                                    | 9                |
| Na-TNT//AC                             | 0-3.0              | 34-13                                | 0.15-0.89                           | 80%/1000/ 0.25 A g <sup>-1</sup>                                                                                                                                                                                                                                                                                                     | 10               |
| <b>MnF<sub>2</sub> 8#//AC (1:1)</b>    | <b>0-4.3</b>       | <b>37-7.2</b>                        | <b>0.54-8.6</b>                     | <b>66.7%/100/ 3 A g<sup>-1#</sup></b><br><b>66.7%/300/ 3 A g<sup>-1#</sup></b><br><b>58.4%/500/ 3 A g<sup>-1#</sup></b><br><b>58.4%/800/ 3 A g<sup>-1#</sup></b><br><b>88.8%/100/ 3 A g<sup>-1*</sup></b><br><b>88.8%/300/ 3 A g<sup>-1*</sup></b><br><b>77.9%/500/ 3 A g<sup>-1*</sup></b><br><b>77.9%/800/ 3 A g<sup>-1*</sup></b> | <b>This work</b> |
| <b>MnF<sub>2</sub> 8#-E//AC (1:1)</b>  | <b>0-4.0</b>       | <b>42.1-8.9</b>                      | <b>0.5-8.0</b>                      | <b>68.4%/100/ 3 A g<sup>-1#</sup></b><br><b>63.1%/200/ 3 A g<sup>-1#</sup></b><br><b>52.7%/500/ 3 A g<sup>-1#</sup></b><br><b>52.7%/800/ 3 A g<sup>-1#</sup></b><br><b>86.7%/100/ 3 A g<sup>-1@</sup></b><br><b>80.0%/200/ 3 A g<sup>-1@</sup></b><br><b>67.2%/500/ 3 A g<sup>-1@</sup></b><br><b>67.2%/800/ 3 A g<sup>-1@</sup></b> |                  |

Note: # Based on the 1<sup>st</sup> cycle; \* Based on the 5<sup>th</sup> cycle; @ Based on the 20<sup>th</sup> cycle

**Table S10** Electrochemical performance comparison for some reported NICs.

| Chemicals, agents and materials                         | Type or level            | Company             | Detailed characteristics or parameters                                                                                  |
|---------------------------------------------------------|--------------------------|---------------------|-------------------------------------------------------------------------------------------------------------------------|
| Mn(CH <sub>3</sub> COO) <sub>2</sub> •4H <sub>2</sub> O | AR                       | SinoPharm           | purity≥99.0%                                                                                                            |
| HF                                                      | AR                       | Zhanyun             | purity≥40.0%                                                                                                            |
| EG                                                      | AR                       | SinoPharm           | purity≥99.0%                                                                                                            |
| NPA                                                     | AR                       | SinoPharm           | purity≥99.0%                                                                                                            |
| NBA                                                     | AR                       | SinoPharm           | purity≥99.0%                                                                                                            |
| NMP                                                     | AR                       | SinoPharm           | purity≥99.0%                                                                                                            |
| NaBH <sub>4</sub>                                       | AR                       | SinoPharm           | purity≥96.0%                                                                                                            |
| AB                                                      | Battery grade            | /                   | /                                                                                                                       |
| PVDF                                                    | Battery grade            | /                   | /                                                                                                                       |
| Li plate                                                | Battery grade            | China Energy        | 15.6*0.45 mm                                                                                                            |
| Na plate                                                | Battery grade            | /                   | /                                                                                                                       |
| Cu foil                                                 | 200*0.015                | GuangZhou JiaYuan   | Total thickness: 15 μm;<br>weight: 87 g m <sup>-2</sup>                                                                 |
| Carbon coated-Al foil                                   | 222*0.015                | GuangZhou NaNuo     | Total thickness: 17 μm;<br>Strength: 192 Mpa<br>Diameter: 25 mm;<br>Thickness: 675 μm;<br>weight: 121 g m <sup>-2</sup> |
| Glass microfiber filters                                | GF/D 2.7 μm;<br>1823-025 | Whatman             | D50: ~10 μm; Density:<br>0.4 g cm <sup>-3</sup> ;<br>SSA:2000~2500 m <sup>2</sup> g <sup>-1</sup>                       |
| AC                                                      | YEC 8b                   | Fuzhou YiHuan       | 1 M LiPF <sub>6</sub> /EC:EMC:DMC<br>(1:1:1) /1% VC                                                                     |
| Li-ion electrolytes                                     | LBC-305-01               | CAPCHEM             | 0.85 M NaPF <sub>6</sub> /EC:DEC<br>(1:1) /<br>5% FEC                                                                   |
| Na-ion electrolytes                                     | /                        | MJS                 | /                                                                                                                       |
| Cell components                                         | CR-2032                  | Shenzhen TianChenHe | /                                                                                                                       |

**Table S11** Chemicals, agents and materials.

## References

1. A. Chaturvedi, P. Hu, C. Kloc, Y. S. Lee, V. Aravindan and S. Madhavi, *J. Mater. Chem. A*, 2017, **5**, 19819-19825.
2. H. Kim, M. Y. Cho, M. H. Kim, K. Y. Park, H. Gwon, Y. Lee, K. C. Roh and K. Kang, *Adv. Energy Mater.*, 2013, **3**, 1500.
3. Z. Chen, V. Augustyn, J. Wen, Y. W. Zhang, M. Q. Shen, B. Dunn and Y. F. Lu, *Adv. Mater.*, 2011, **23**, 791.
4. V. Aravindan, N. Shubha, W. C. Ling and S. Madhavi, *J. Mater. Chem. A*, 2013, **1**, 6145-6151.
5. H. W. Wang, C. Guan, X. F. Wang and H. J. Fan, *Small*, 2015, **11**, 1470-1477.
6. F. X. Wang, C. Wang, Y. J. Zhao, Z. C. Liu, Z. Chang, L. J. Fu, Y. S. Zhu, Y. P. Wu and D. Y. Zhao, *Small*, 2016, **12**, 6207-6213.
7. R. Ding, L. Qi and H. Y. Wang, *Electrochim. Acta*, 2013, **114**, 726-735.
8. Z. X. Chen, T. C. Yuan, X. J. Pu, H. X. Yang, X. P. Ai, Y. Y. Xia and Y. L. Cao, *ACS Appl. Mater. Interfaces*, 2018, **10**, 11689-11698.
9. Z. Chen, V. Augustyn, X. L. Jia, Q. F. Xiao, B. Dunn and Y. F. Lu, *ACS Nano*, 2012, **6**, 4319-4327.
10. J. Yin, L. Qi and H. Y. Wang, *ACS Appl. Mater. Interfaces*, 2012, **4**, 2762-2768.
